# Supplementary material for: Unravelling a general mechanism of converting ionic B/N complexes into neutral B/N analogues of alkanes: Hδ+⋯Hδ– dihydrogen bonding assisted dehydrogenation
Source: Royal Society of Chemistry journal article supplement (doi:10.1039/c9cc07133d), 2019-01-01
Supplement: c9cc07133d1.pdf [file c9cc07133d1.pdf]

## Supporting Information

### **Unraveling a general mechanism of converting ionic B/N complexes into neutral B/N analogues of alkanes: $H^{\delta+}\cdots H^{\delta-}$ dihydrogen bonding assisted dehydrogenation**

Xi-Meng Chen,<sup>a</sup> Si-Cong Liu,<sup>b</sup> Cong-Qiao Xu,<sup>c,d</sup> Yi Jing,<sup>a</sup> Donghui Wei,<sup>\*b</sup> Jun Li<sup>\*c</sup> and Xuenian Chen<sup>\*a,b</sup>

<sup>a</sup>*Henan Key Laboratory of Boron Chemistry and Advanced Energy Materials, School of Chemistry and Chemical Engineering, Henan Normal University, Xinxiang, Henan 453007, China. E-mail: xnchen@htu.edu.cn (X.C.)*

<sup>b</sup>*College of Chemistry and Molecular Engineering, Zhengzhou University, Zhengzhou, Henan 450001, China. E-mail: donghuiwei@zzu.edu.cn (D.W.)*

<sup>c</sup>*Department of Chemistry and Key Laboratory of Organic Optoelectronics & Molecular Engineering of Ministry of Education, Tsinghua University, Beijing 100084, China. E-mail: junli@tsinghua.edu.cn (J.L.)*

<sup>d</sup>*Department of Chemistry, Southern University of Science and Technology, Shenzhen 518055, China*

## Table of Contents:

|                                                                                                                                                                                                                                                                                                                                                             |     |
|-------------------------------------------------------------------------------------------------------------------------------------------------------------------------------------------------------------------------------------------------------------------------------------------------------------------------------------------------------------|-----|
| 1. Experimental Section:.....                                                                                                                                                                                                                                                                                                                               | S4  |
| 1.1. General Remarks.....                                                                                                                                                                                                                                                                                                                                   | S4  |
| 1.2. Stability of $[\text{NH}_3\text{BH}_2\text{NH}_3]\text{BH}_4$ .....                                                                                                                                                                                                                                                                                    | S4  |
| 1.3. The confirmation of the $\text{THF}\cdot\text{BH}_3$ intermediate formed in the dehydrogenation process of $[\text{NH}_3\text{BH}_2\text{NH}_3]\text{BH}_4$ .....                                                                                                                                                                                      | S5  |
| 1.4. The confirmation of the $\text{THFBH}_2\text{NH}_2\text{BH}_3$ intermediate formed in the dehydrogenation process of $[\text{NH}_4][\text{BH}_3\text{NH}_2\text{BH}_3]$ .....                                                                                                                                                                          | S5  |
| 1.5. Synthesis of $\text{NH}_3\text{BH}_2\text{NH}_2\text{BH}_2\text{Cl}$ .....                                                                                                                                                                                                                                                                             | S5  |
| 1.6. Synthesis of $[\text{NH}_3\text{BH}_2\text{NH}_2\text{BH}_2\text{NH}_3]\text{Cl}$ .....                                                                                                                                                                                                                                                                | S5  |
| 1.7. Synthesis of $[\text{NH}_3\text{BH}_2\text{NH}_2\text{BH}_2\text{NH}_3]\text{BH}_4$ .....                                                                                                                                                                                                                                                              | S6  |
| 1.8. Reaction of $[\text{NH}_3\text{BH}_2\text{NH}_3]\text{Cl}$ with $\text{Na}[\text{BH}_3\text{NH}_2\text{BH}_3]$ .....                                                                                                                                                                                                                                   | S6  |
| 1.9. Reaction of $\text{Na}[\text{BH}_3\text{NH}_2\text{BH}_2\text{NH}_2\text{BH}_3]$ with $[\text{NH}_3\text{BH}_2\text{NH}_3]\text{Cl}$ .....                                                                                                                                                                                                             | S7  |
| 2. Table: .....                                                                                                                                                                                                                                                                                                                                             | S8  |
| Table S1. Energies of the stationary points obtained by DLPNO-CCSD(T)/def2-TZVP and M06-2X/6-311++G(d, p)/SMD <sub>THF</sub> calculations.....                                                                                                                                                                                                              | S8  |
| 3. Supporting Results:.....                                                                                                                                                                                                                                                                                                                                 | S9  |
| Fig. S1 X-ray powder diffraction data of the formed $[\text{NH}_2\text{BH}_2]_n$ .....                                                                                                                                                                                                                                                                      | S9  |
| Fig. S2 $^{11}\text{B}$ NMR spectrum of the formed $\text{NH}_3\text{BH}_3$ .....                                                                                                                                                                                                                                                                           | S9  |
| Fig. S3 X-ray powder diffraction data of the formed $\text{NH}_3\text{BH}_3$ .....                                                                                                                                                                                                                                                                          | S10 |
| Fig. S4 The $^{11}\text{B}\{^1\text{H}\}$ NMR spectra of the products when (a) DADB and (b) AADB dehydrogenate in THF with the presence of $(\text{CH}_3)_2\text{NH}$ . a, $\text{NH}_3\text{BH}_3$ ; b, $(\text{CH}_3)_2\text{NHBH}_3$ ; c, $\text{NH}_3\text{BH}_2\text{NH}_2\text{BH}_3$ ; d, $(\text{CH}_3)_2\text{NHBH}_2\text{NH}_2\text{BH}_3$ ..... | S10 |
| Fig. S5 $^{11}\text{B}$ NMR (a) and $^{11}\text{B}\{^1\text{H}\}$ NMR (b) spectra of the prepared $\text{NH}_3\text{BH}_2\text{NH}_2\text{BH}_2\text{Cl}$ in $\text{THF-}d_8$ .....                                                                                                                                                                         | S11 |
| Fig. S6 $^1\text{H}$ NMR (a) and $^1\text{H}\{^{11}\text{B}\}$ NMR (b) spectra of the prepared $\text{NH}_3\text{BH}_2\text{NH}_2\text{BH}_2\text{Cl}$ in $\text{THF-}d_8$ .....                                                                                                                                                                            | S11 |
| Fig. S7 IR spectrum of the prepared $\text{NH}_3\text{BH}_2\text{NH}_2\text{BH}_2\text{Cl}$ .....                                                                                                                                                                                                                                                           | S12 |
| Fig. S8 $^{11}\text{B}$ NMR spectrum of the prepared $[\text{NH}_3\text{BH}_2\text{NH}_2\text{BH}_2\text{NH}_3]\text{Cl}$ in $\text{DMF-}d_7$ .....                                                                                                                                                                                                         | S12 |
| Fig. S9 $^1\text{H}$ NMR (a) and $^1\text{H}\{^{11}\text{B}\}$ NMR (b) spectra of the prepared $[\text{NH}_3\text{BH}_2\text{NH}_2\text{BH}_2\text{NH}_3]\text{Cl}$ in $\text{DMF-}d_7$ .....                                                                                                                                                               | S13 |
| Fig. S10 IR spectrum of the prepared $[\text{NH}_3\text{BH}_2\text{NH}_2\text{BH}_2\text{NH}_3]\text{Cl}$ .....                                                                                                                                                                                                                                             | S13 |
| Fig. S11 Variable temperature $^{11}\text{B}$ NMR spectra of the prepared $[\text{NH}_3\text{BH}_2\text{NH}_2\text{BH}_2\text{NH}_3]^+[\text{BH}_4]^-$ in THF.....                                                                                                                                                                                          | S14 |
| Fig. S12 X-ray powder diffraction data of the $\text{NaCl}$ isolated from the reaction of $[\text{NH}_3\text{BH}_2\text{NH}_2\text{BH}_2\text{NH}_3]\text{Cl}$ with $\text{NaBH}_4$ .....                                                                                                                                                                   | S14 |

|                                                                                                                                                                                                                                                                                                                                          |     |
|------------------------------------------------------------------------------------------------------------------------------------------------------------------------------------------------------------------------------------------------------------------------------------------------------------------------------------------|-----|
| Fig. S13 IR spectrum of the formed $[\text{NH}_2\text{BH}_2]_n$ .....                                                                                                                                                                                                                                                                    | S15 |
| Fig. S14 X-ray powder diffraction data of the formed $\text{NH}_3\text{BH}_3$ .....                                                                                                                                                                                                                                                      | S15 |
| Fig. S15 X-ray powder diffraction data of the NaCl isolated from the reaction of $[\text{NH}_3\text{BH}_2\text{NH}_3]\text{Cl}$ with $\text{Na}[\text{BH}_3\text{NH}_2\text{BH}_3]$ .....                                                                                                                                                | S16 |
| Fig. S16 IR spectrum of the formed $[\text{NH}_2\text{BH}_2]_n$ isolated from the reaction of $[\text{NH}_3\text{BH}_2\text{NH}_3]\text{Cl}$ with $\text{Na}[\text{BH}_3\text{NH}_2\text{BH}_3]$ .....                                                                                                                                   | S16 |
| Fig. S17 $^{11}\text{B}$ NMR (a) and $^{11}\text{B}\{^1\text{H}\}$ NMR (b) spectra of the $\text{NH}_3\text{BH}_2\text{NH}_2\text{BH}_3$ in THF, which was isolated from the reaction of $[\text{NH}_3\text{BH}_2\text{NH}_3]\text{Cl}$ with $\text{Na}[\text{BH}_3\text{NH}_2\text{BH}_3]$ . ....                                       | S17 |
| Fig. S18 X-ray powder diffraction data of a mixture of $\text{NH}_3\text{BH}_3$ ( $\downarrow$ ) and $\text{NH}_3\text{BH}_2\text{NH}_2\text{BH}_2\text{NH}_3$ ( $\bullet$ ) isolated from the reaction of $[\text{NH}_3\text{BH}_2\text{NH}_3]\text{Cl}$ and $\text{Na}[\text{BH}_3\text{NH}_2\text{BH}_2\text{NH}_2\text{BH}_3]$ ..... | S17 |
| Fig. S19 $^{11}\text{B}$ NMR spectrum of the mixture of $\text{NH}_3\text{BH}_3$ and $\text{NH}_3\text{BH}_2\text{NH}_2\text{BH}_2\text{NH}_3$ in THF. ....                                                                                                                                                                              | S18 |
| 4. References:.....                                                                                                                                                                                                                                                                                                                      | S19 |
| 5. Geometrical Coordinates and Vibrational Frequencies of the Listed Compounds .....                                                                                                                                                                                                                                                     | S20 |

## 1. Experimental Section:

### 1.1. General Remarks.

All manipulations were carried out on a Schlenk line or in a glove box filled with high-purity nitrogen. The  $^{11}\text{B}$  NMR and  $^{11}\text{B}\{^1\text{H}\}$  NMR spectra were recorded at 128 or 193 MHz spectrometers and externally referenced to  $\text{BF}_3\cdot\text{OEt}_2$  in  $\text{C}_6\text{D}_6$  ( $\delta = 0.00$  ppm). The  $^1\text{H}$  NMR and  $^1\text{H}\{^{11}\text{B}\}$  NMR spectra were obtained at 600 MHz spectrometer. X-ray diffraction (XRD) data were obtained with a Rigaku D/max2500 diffractometer using  $\text{Cu}/\text{K}$  radiation,  $\lambda = 0.1542$  nm, 40 kV, 100 mA. IR spectra were measured by a Spectrum 400F.

$\text{NH}_3$ ,  $\text{NH}_3\text{BH}_3$  (AB),  $\text{NaBH}_4$ , tetrahydrofuran (THF) solution of  $(\text{CH}_3)_2\text{NH}$  (2 M), diethyl ether solution of HCl were used as received. NaH was washed with THF and hexane and then dried under vacuum. Ammonium chloride ( $\text{NH}_4\text{Cl}$ ) was recrystallized in methanol. The  $\text{NH}_3\text{BH}_2\text{NH}_2\text{BH}_3$ ,  $\text{Na}[\text{BH}_3\text{NH}_2\text{BH}_3]$ ,  $\text{Na}[\text{BH}_3\text{NH}_2\text{BH}_2\text{NH}_2\text{BH}_3]$  and  $[\text{NH}_3\text{BH}_2\text{NH}_3]\text{Cl}$  were prepared according to the literature methods.<sup>1</sup> THF and hexane were dried over sodium and freshly distilled prior to use.

The theoretical calculations were performed at the level of density functional theory (DFT) with hybrid meta-GGA functional M06-2X<sup>2-4</sup> using the Gaussian 09 program.<sup>5</sup> Gaussian basis sets 6-311++G(d, p) were used for all atoms involved in the model reaction. The solvent effect was considered by using the SMD model<sup>6</sup> in THF solvent for all kinds of calculations. After the structural optimizations for all the stationary points, vibrational frequency calculations at the same level of theory were carried out to identify all of the stationary points as minima (zero number of imaginary frequency) or transition state (with only one imaginary frequency), and to provide corrections for Gibbs free energies. In order to obtain more accurate energy at the DFT-optimized structures, the DLPNO-CCSD(T)/def2-TZVP single-point energy calculations<sup>7</sup> have been done using the ORCA program,<sup>8</sup> with the setting of tightscf and grid4.

### 1.2. Stability of $[\text{NH}_3\text{BH}_2\text{NH}_3]\text{BH}_4$ .

The  $[\text{NH}_3\text{BH}_2\text{NH}_3]\text{BH}_4$  was prepared according to the literature method.<sup>1b</sup> The  $[\text{NH}_3\text{BH}_2\text{NH}_3]\text{BH}_4$  (10 mmol, 0.62 g) was placed in a flask, and then 30 mL of THF was injected. The solution was stirred for 2 hours at room temperature and  $[\text{NH}_2\text{BH}_2]_n$  precipitated was formed (0.27 g, 93%, Fig. S1).<sup>9</sup> After the precipitate being filtered out, the THF was removed from the filtrate under a dynamic vacuum to leave white powder product  $\text{NH}_3\text{BH}_3$  (0.28 g, 91%, Fig. S2 and S3).  $\text{NH}_3\text{BH}_3$ :  $^{11}\text{B}$  NMR (128 MHz, THF):  $\delta$  -22.3 ( $q$ ,  $J_{\text{B-H}} = 95$  Hz) ppm (Fig. S2).

### 1.3. The determination of the THF·BH<sub>3</sub> intermediate formed in the dehydrogenation process of [NH<sub>3</sub>BH<sub>2</sub>NH<sub>3</sub>]BH<sub>4</sub>.

The prepared [NH<sub>3</sub>BH<sub>2</sub>NH<sub>3</sub>]BH<sub>4</sub> (5 mmol, 0.31 g) was placed in a flask, and then 20 mL of THF and (CH<sub>3</sub>)<sub>2</sub>NH (3 mmol, 1.5 mL) were injected at -40 °C. Then the reaction solution was warm up to room temperature. After stirred for 10 min, the reaction solution was monitored by <sup>11</sup>B NMR (Fig. 2a) and <sup>11</sup>B {<sup>1</sup>H} NMR (Fig. S4a).

### 1.4. The determination of the THFBH<sub>2</sub>NH<sub>2</sub>BH<sub>3</sub> intermediate formed in the dehydrogenation process of [NH<sub>4</sub>][BH<sub>3</sub>NH<sub>2</sub>BH<sub>3</sub>].

The [NH<sub>4</sub>][BH<sub>3</sub>NH<sub>2</sub>BH<sub>3</sub>] sample was prepared according the literature method.<sup>10</sup> The prepared [NH<sub>4</sub>][BH<sub>3</sub>NH<sub>2</sub>BH<sub>3</sub>] (5 mmol, 0.31 g) was placed in a flask, and then 20 mL of THF and (CH<sub>3</sub>)<sub>2</sub>NH (3 mmol, 1.5 mL) were injected at -40 °C. Then the reaction solution was warm up to room temperature. After stirred for 10 min, the reaction solution was monitored by <sup>11</sup>B NMR (Fig. 2b) and <sup>11</sup>B {<sup>1</sup>H} NMR (Fig. S4b).

### 1.5. Synthesis of NH<sub>3</sub>BH<sub>2</sub>NH<sub>2</sub>BH<sub>2</sub>Cl.

The prepared NH<sub>3</sub>BH<sub>2</sub>NH<sub>2</sub>BH<sub>3</sub> (5 mmol, 0.30 g) was added to a flask and then 30 mL of THF was injected. A solution of 1 M HCl in diethyl ether (5 mL, 5 mmol) was added dropwise to the flask at room temperature and stirred for 1 hour (eqn (S1)). Then the THF was removed from the reaction solution under a dynamic vacuum to leave white powder product NH<sub>3</sub>BH<sub>2</sub>NH<sub>2</sub>BH<sub>2</sub>Cl (0.40 g, 85%). <sup>11</sup>B NMR (128 MHz, THF-*d*<sub>8</sub>): δ -8.4 (*t*, *J*<sub>B-H</sub> = 113 Hz, BH<sub>2</sub>Cl), -13.1 (*q*, *J*<sub>B-H</sub> = 103 Hz, BH<sub>2</sub>) ppm (Fig. S5a). <sup>11</sup>B {<sup>1</sup>H} NMR (128 MHz, THF-*d*<sub>8</sub>): δ -8.4 (*s*, BH<sub>2</sub>Cl), -13.1 (*s*, BH<sub>2</sub>) ppm (Fig. S5b). <sup>1</sup>H NMR (600 MHz, THF-*d*<sub>8</sub>): δ 4.60 (*br t*, 3H of NH<sub>3</sub>), 3.07 (*br s*, 2H of NH<sub>2</sub>), 2.53 (*q*, 2 H of ClBH<sub>2</sub>), 2.02 (*q*, 2 H of BH<sub>2</sub>) ppm (Fig. S6a). <sup>1</sup>H {<sup>11</sup>B} NMR (600 MHz, THF-*d*<sub>8</sub>): δ 4.60 (*br t*, 3H of NH<sub>3</sub>), 3.07 (*br s*, 2H of NH<sub>2</sub>), 2.53 (*m*, 2 H of ClBH<sub>2</sub>), 2.02 (*m*, 2 H of BH<sub>2</sub>) ppm (Figure S6b). IR (cm<sup>-1</sup>): 3111 (*s*, *br*), 2413 (*s*), 2343 (*s*), 1585 (*m*), 1410 (*s*), 1268 (*s*), 1212 (*s*), 1136 (*s*), 1040 (*m*), 981 (*w*), 877 (*m*), 814 (*m*), 718 (*w*) (Fig. S7).

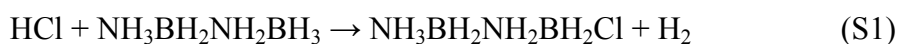

### 1.6. Synthesis of [NH<sub>3</sub>BH<sub>2</sub>NH<sub>2</sub>BH<sub>2</sub>NH<sub>3</sub>]Cl.

NH<sub>3</sub>BH<sub>2</sub>NH<sub>2</sub>BH<sub>2</sub>Cl (0.47 g, 5 mmol) was placed in a flask, and the 20 mL of THF was injected into the flask. Then excess NH<sub>3</sub> was bubbleed into the flask at 0 °C and more white precipitate produced immediately (eqn (S2)). The solid was filtration, and washed with THF (3 × 20 mL) and dried under a dynamic vacuum to yield [NH<sub>3</sub>BH<sub>2</sub>NH<sub>2</sub>BH<sub>2</sub>NH<sub>3</sub>]Cl (0.51 g, 91%). <sup>11</sup>B NMR (128 MHz, DMF-*d*<sub>7</sub>): δ -13.5 (*t*, *J*<sub>B-H</sub> = 103 Hz, BH<sub>2</sub>) ppm (Fig. S8). <sup>1</sup>H NMR (600 MHz, DMF-*d*<sub>7</sub>): δ 5.61 (*br s*, 6H of 2 NH<sub>3</sub>),

3.83 (*s*, 2H of NH<sub>2</sub>), 2.11 (*br*, 4 H of BH<sub>2</sub>) ppm (Fig. S9a). <sup>1</sup>H{<sup>11</sup>B} NMR (600 MHz, DMF-*d*<sub>7</sub>): δ 5.60 (*br s*, 6H of 2 NH<sub>3</sub>), 3.83 (*s*, 2H of NH<sub>2</sub>), 2.11 (*s*, 4 H of BH<sub>2</sub>) ppm (Fig. S9b). IR (cm<sup>-1</sup>): 3277 (*s*), 3099 (*br, s*), 2399 (*s*), 2345 (*s*), 2302 (*m*), 1609 (*w*), 1554 (*w*), 1410 (*s*), 1262 (*m*), 1214 (*s*), 1146 (*s*), 1070 (*s*), 997 (*m*), 917 (*m*), 808 (*m*), 703 (*w*), 655 (*w*) (Fig. S10).

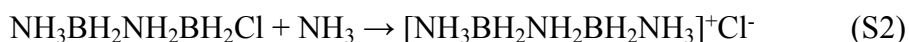

### 1.7. Synthesis of [NH<sub>3</sub>BH<sub>2</sub>NH<sub>2</sub>BH<sub>2</sub>NH<sub>3</sub>]BH<sub>4</sub>.

The prepared [NH<sub>3</sub>BH<sub>2</sub>NH<sub>2</sub>BH<sub>2</sub>NH<sub>3</sub>]Cl (4.5 mmol, 0.51 g) and NaBH<sub>4</sub> (4.5 mmol, 0.17 g) were added to a flask and then 30 mL of liquid NH<sub>3</sub> was condensed into the flask at -78 °C and stirred for 1 hour (eqn (S3)). Then the reaction was warm up to room temperature and liquid NH<sub>3</sub> was volatilized completely to leave a white product. The solid product was extracted with 100 mL of THF at -78 °C and the THF solution was monitored by <sup>11</sup>B NMR at low temperatures (Fig. S11a). Some white precipitate was filtered out and then the resulting residue was dried under a dynamic vacuum to give white product, which was confirmed by XRD to be pure NaCl (Fig. S12). Then the filtrate was warm up to room temperature and stirred for 1 hour. During this time, some white precipitate produced. Then the resulting precipitate was filtered and dried under dynamic vacuum to give the [NH<sub>2</sub>BH<sub>2</sub>]<sub>n</sub> white product, which was confirmed by IR (0.24 g, 91%, Fig. S13). Removal of THF from the filtrate under dynamic vacuum gave NH<sub>3</sub>BH<sub>3</sub> as a white product (0.13 g, 93%, Fig. S14). [NH<sub>3</sub>BH<sub>2</sub>NH<sub>2</sub>BH<sub>2</sub>NH<sub>3</sub>]BH<sub>4</sub>: <sup>11</sup>B NMR (193 MHz, THF): δ -14.3 (*br*, BH<sub>2</sub>), -37.7 ppm (*q*, *J*<sub>B-H</sub> = 81 Hz, BH<sub>4</sub>) (Fig. S11a). [NH<sub>2</sub>BH<sub>2</sub>]<sub>n</sub>: IR (cm<sup>-1</sup>): 3300 (*s*), 3248 (*s*), 2399 (*s, br*), 1560 (*s*), 1405 (*s, br*), 1208 (*s, br*), 1082 (*s*), 1059 (*s*), 846 (*m*), 710 (*w*) (Fig. S13).

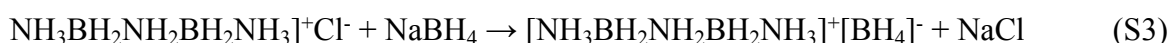

### 1.8. Reaction of [NH<sub>3</sub>BH<sub>2</sub>NH<sub>3</sub>]Cl with Na[BH<sub>3</sub>NH<sub>2</sub>BH<sub>3</sub>].

Na[BH<sub>3</sub>NH<sub>2</sub>BH<sub>3</sub>] (0.34 g, 5 mmol) and [NH<sub>3</sub>BH<sub>2</sub>NH<sub>3</sub>]Cl (0.41 g, 5mmol) were added to a flask and then 30 mL of liquid NH<sub>3</sub> was condensed into the flask at -78 °C and stirred for 2 hours. Then the reaction was warm up to room temperature and liquid NH<sub>3</sub> was volatilized completely to leave a white product. The solid product was extracted with 100 mL of THF at -78 °C. Some white precipitate (NaCl, Fig. S15) was filtered out and then the filtrate was warm up to room temperature and stirred for 1 hour. During this time, some white precipitate produced. Then the resulting precipitate was filtered and dried under dynamic vacuum to give the [NH<sub>2</sub>BH<sub>2</sub>]<sub>n</sub> white product (Fig. S16).<sup>9</sup> Removal of THF from the filtrate under dynamic vacuum gave NH<sub>3</sub>BH<sub>2</sub>NH<sub>2</sub>BH<sub>3</sub> as a white product (0.23 g, 76%).<sup>1c</sup> NH<sub>3</sub>BH<sub>2</sub>NH<sub>2</sub>BH<sub>3</sub>: <sup>11</sup>B NMR (193 MHz, THF): δ -11.6 (*t*, *J*<sub>B-H</sub> = 103 Hz, BH<sub>2</sub>), -22.7 (*q*, *J*<sub>B-H</sub> = 92 Hz, BH<sub>3</sub>) ppm (Fig. S17a). <sup>11</sup>B{<sup>1</sup>H} NMR (193 MHz, THF): δ -11.6 (*s*, BH<sub>2</sub>), -22.7 (*q*, BH<sub>3</sub>) ppm (Fig.

S17b).  $[\text{NH}_2\text{BH}_2]_n$ : IR ( $\text{cm}^{-1}$ ): 3248 (s), 2946 (w), 2342 (s, br), 1402 (s), 1170 (m), 1053 (m), 863 (w), 810 (w) 705 (w) (Fig. S16).

### **1.9. Reaction of $\text{Na}[\text{BH}_3\text{NH}_2\text{BH}_2\text{NH}_2\text{BH}_3]$ with $[\text{NH}_3\text{BH}_2\text{NH}_3]\text{Cl}$ .**

The prepared  $\text{Na}[\text{BH}_3\text{NH}_2\text{BH}_2\text{NH}_2\text{BH}_3]$  (0.48 g, 5 mmol) and  $[\text{NH}_3\text{BH}_2\text{NH}_3]\text{Cl}$  (0.41 g, 5mmol) were added to a flask and then 30 mL of liquid  $\text{NH}_3$  was condensed into the flask at  $-78\text{ }^\circ\text{C}$  and stirred for 2 hours. Then the reaction was warm up to room temperature and liquid  $\text{NH}_3$  was volatilized completely to leave a white product. The solid product was extracted with 100 mL of THF. The formed  $\text{NaCl}$  was filtered out. Then THF was removed from the filtrate under a dynamic vacuum to leave white powderproduct (0.41 g), which was confirmed by XRD (Fig. S18) and  $^{11}\text{B}$  NMR (Fig. S19) to be a mixture of  $\text{NH}_3\text{BH}_2\text{NH}_2\text{BH}_2\text{NH}_2\text{BH}_3$  and  $\text{NH}_3\text{BH}_3$ .

## 2. Table:

**Table S1.** Energies of the stationary points obtained by DLPNO-CCSD(T)/def2-TZVP and M06-2X/6-311++G(d, p)/SMD<sub>THF</sub> calculations.

|                                                                                  | Thermal Correction to Gibbs<br>Free Energy using M06-2X<br>(a.u.) | Single-Point Energy using<br>DLPNO-CCSD(T) (a.u.) |
|----------------------------------------------------------------------------------|-------------------------------------------------------------------|---------------------------------------------------|
| DADB+THF                                                                         | 0.211895                                                          | -398.1032104                                      |
| TS1                                                                              | 0.207625                                                          | -398.0707613                                      |
| THF                                                                              | 0.089014                                                          | -232.0212807                                      |
| NH <sub>3</sub> BH <sub>2</sub> NH <sub>2</sub> +BH <sub>3</sub> ·H <sub>2</sub> | 0.10153                                                           | -166.0508035                                      |
| pre-TS2                                                                          | 0.214391                                                          | -398.082362494                                    |
| TS2                                                                              | 0.210981                                                          | -398.0766076                                      |
| H <sub>2</sub>                                                                   | -0.001322                                                         | -1.168270988                                      |
| NH <sub>3</sub> BH <sub>2</sub> NH <sub>2</sub> +THF·BH <sub>3</sub>             | 0.198304                                                          | -396.9317739                                      |
| TS3                                                                              | 0.199739                                                          | -396.9142909                                      |
| NH <sub>3</sub> BH <sub>2</sub> NH <sub>2</sub> BH <sub>3</sub>                  | 0.095262                                                          | -164.9178262                                      |
| TS4                                                                              | 0.195469                                                          | -396.9282474                                      |
| NH <sub>2</sub> BH <sub>2</sub>                                                  | 0.025576                                                          | -81.87207442                                      |
| NH <sub>3</sub> +THF·BH <sub>3</sub>                                             | 0.148345                                                          | -315.0510024                                      |
| TS5                                                                              | 0.15036                                                           | -315.0393899                                      |
| NH <sub>3</sub> BH <sub>3</sub>                                                  | 0.048163                                                          | -83.03935266                                      |
| AADB                                                                             | 0.110629                                                          | -166.0650988                                      |
| TS6                                                                              | 0.104732                                                          | -166.0437454                                      |
| NH <sub>3</sub>                                                                  | 0.015341                                                          | -56.46050045                                      |
| BH <sub>3</sub> NH <sub>2</sub> BH <sub>2</sub> ·H <sub>2</sub>                  | 0.069671                                                          | -109.5759111                                      |
| TS7                                                                              | 0.179075                                                          | -341.6145166                                      |
| THFBH <sub>2</sub> NH <sub>2</sub> BH <sub>3</sub>                               | 0.16914                                                           | -340.4776273                                      |
| TS8                                                                              | 0.1981                                                            | -396.9111914                                      |
| TS9                                                                              | 0.201121                                                          | -396.9260331                                      |

\* 1 a.u. = 627.503 kcal/mol.



### 3. Supporting Results:

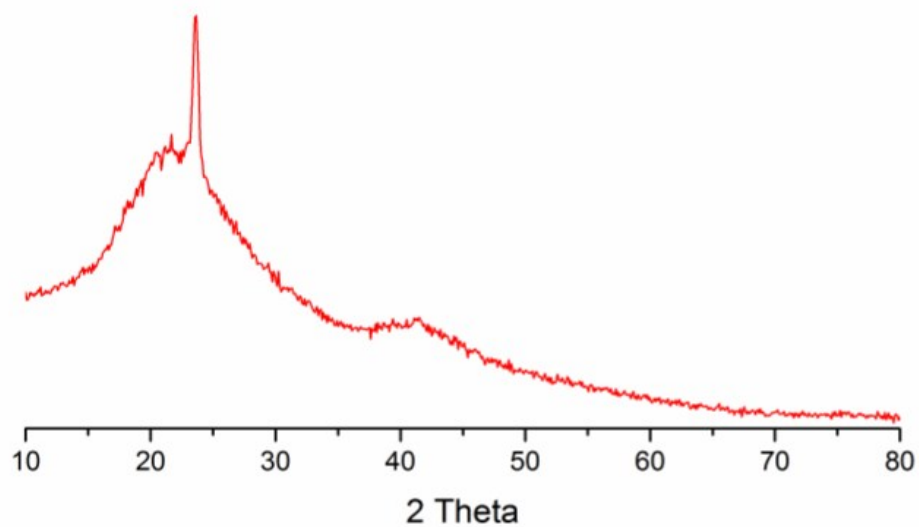

**Fig. S1** X-ray powder diffraction data of the formed  $[\text{NH}_2\text{BH}_2]_n$ .

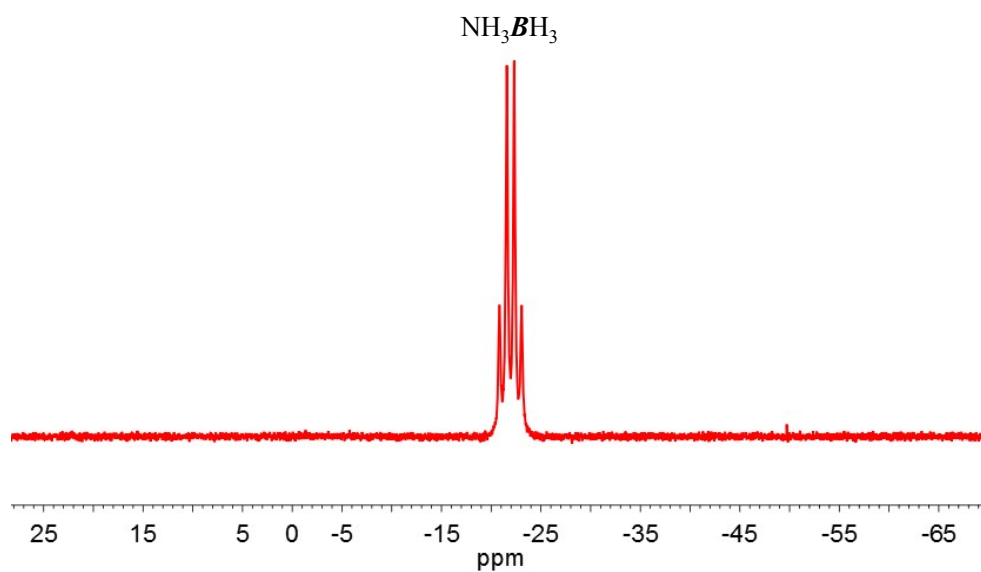

**Fig. S2**  $^{11}\text{B}$  NMR spectrum of the formed  $\text{NH}_3\text{BH}_3$ .

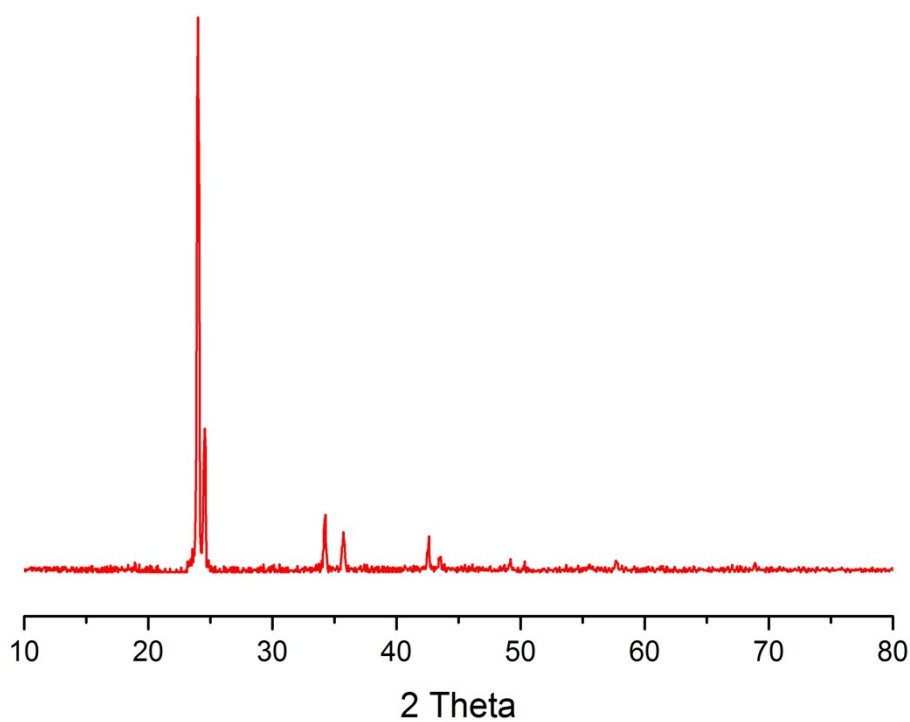

**Fig. S3** X-ray powder diffraction data of the formed  $\text{NH}_3\text{BH}_3$ .

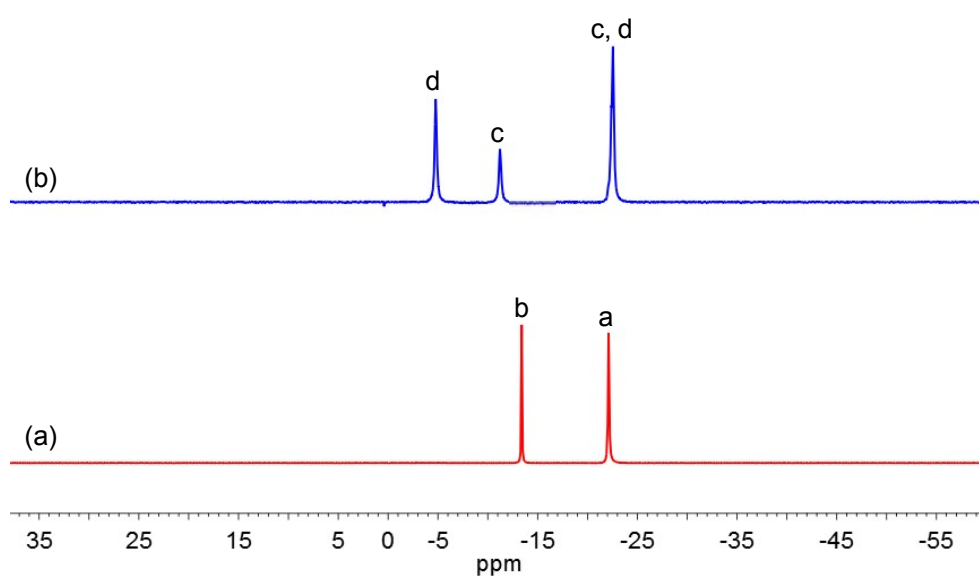

**Fig. S4** The  $^{11}\text{B}\{^1\text{H}\}$  NMR spectra of the products when (a) DADB and (b) AADB dehydrogenate in THF with the presence of  $(\text{CH}_3)_2\text{NH}$ . a,  $\text{NH}_3\text{BH}_3$ ; b,  $(\text{CH}_3)_2\text{NHBH}_3$ ; c,  $\text{NH}_3\text{BH}_2\text{NH}_2\text{BH}_3$ ; d,  $(\text{CH}_3)_2\text{NHBH}_2\text{NH}_2\text{BH}_3$ .

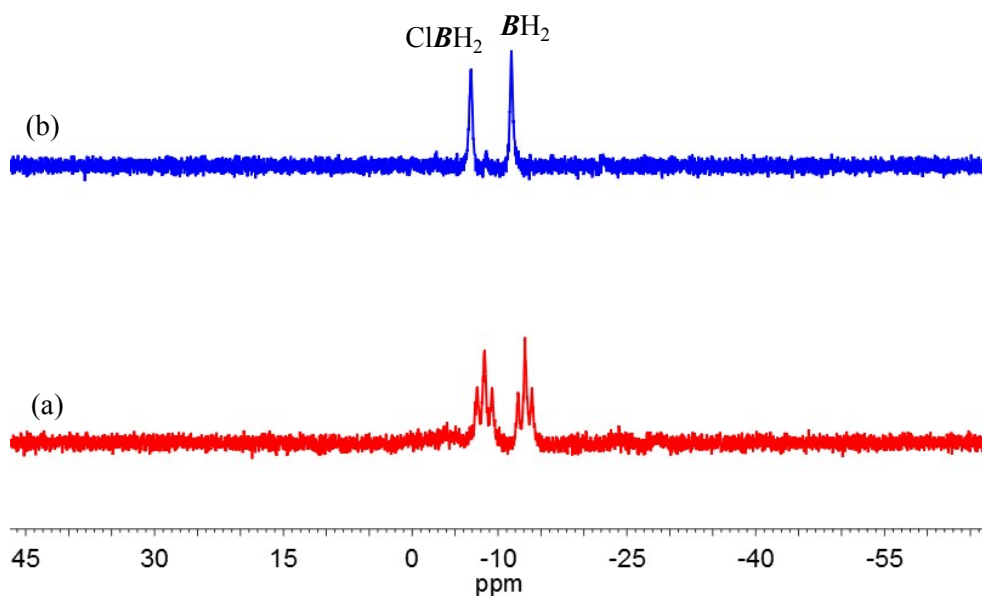

**Fig. S5**  $^{11}\text{B}$  NMR (a) and  $^{11}\text{B}\{^1\text{H}\}$  NMR (b) spectra of the prepared  $\text{NH}_3\text{BH}_2\text{NH}_2\text{BH}_2\text{Cl}$  in  $\text{THF-}d_8$ .

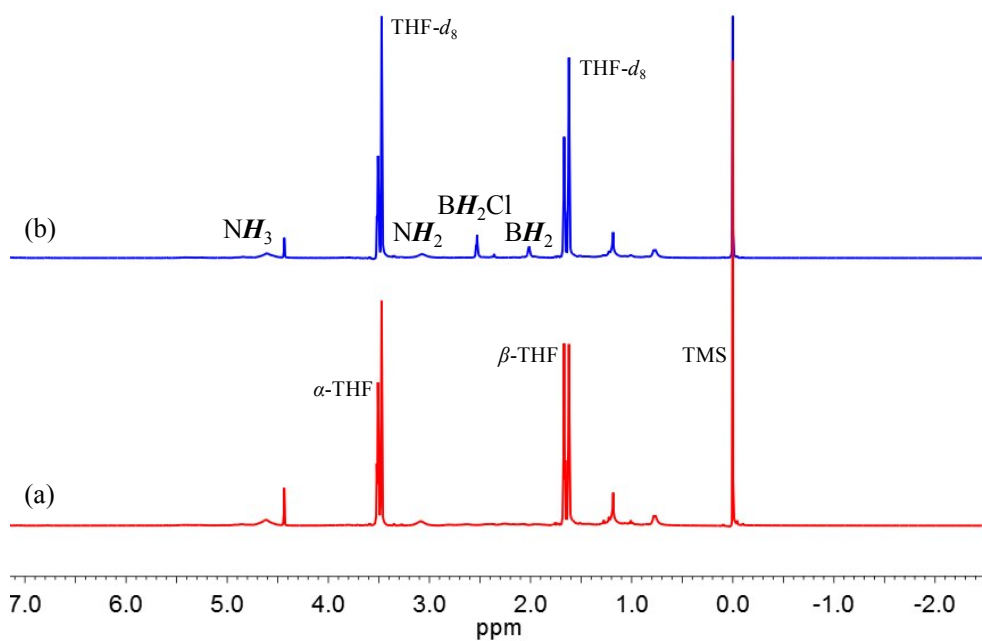

**Fig. S6**  $^1\text{H}$  NMR (a) and  $^1\text{H}\{^{11}\text{B}\}$  NMR (b) spectra of the prepared  $\text{NH}_3\text{BH}_2\text{NH}_2\text{BH}_2\text{Cl}$  in  $\text{THF-}d_8$ .

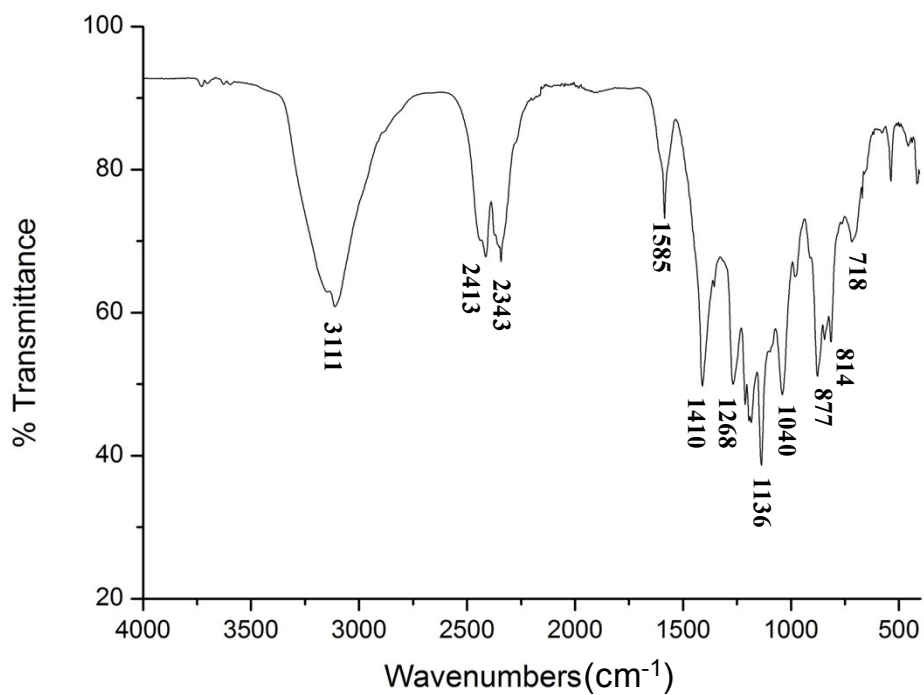

Fig. S7 IR spectrum of the prepared  $\text{NH}_3\text{BH}_2\text{NH}_2\text{BH}_2\text{Cl}$ .

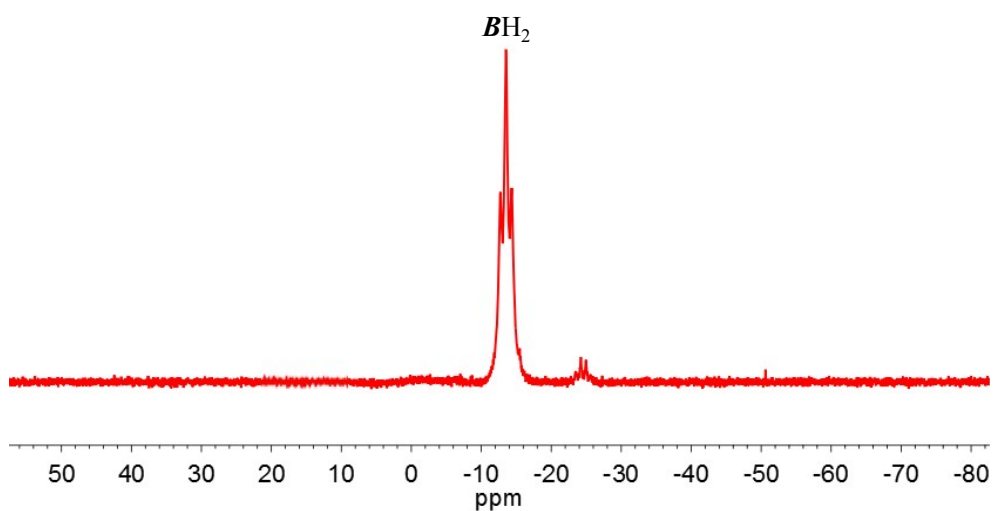

Fig. S8  $^{11}\text{B}$  NMR spectrum of the prepared  $[\text{NH}_3\text{BH}_2\text{NH}_2\text{BH}_2\text{NH}_3]\text{Cl}$  in  $\text{DMF-}d_7$ .

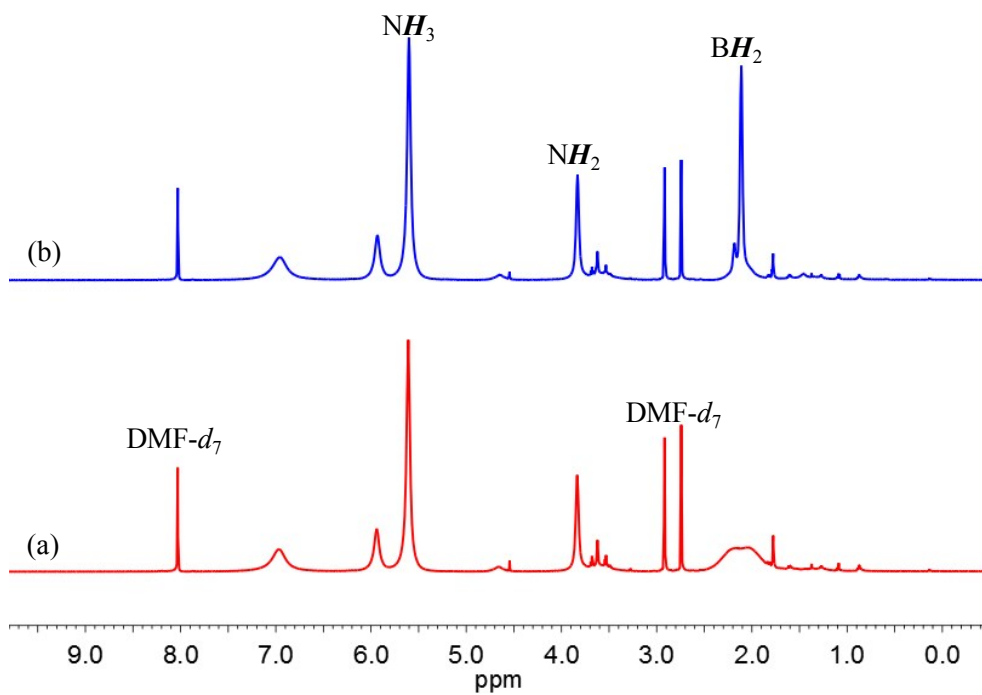

**Fig. S9**  $^1\text{H}$  NMR (a) and  $^1\text{H}\{^{11}\text{B}\}$  NMR (b) spectra of the prepared  $[\text{NH}_3\text{BH}_2\text{NH}_2\text{BH}_2\text{NH}_3]\text{Cl}$  in  $\text{DMF-}d_7$ .

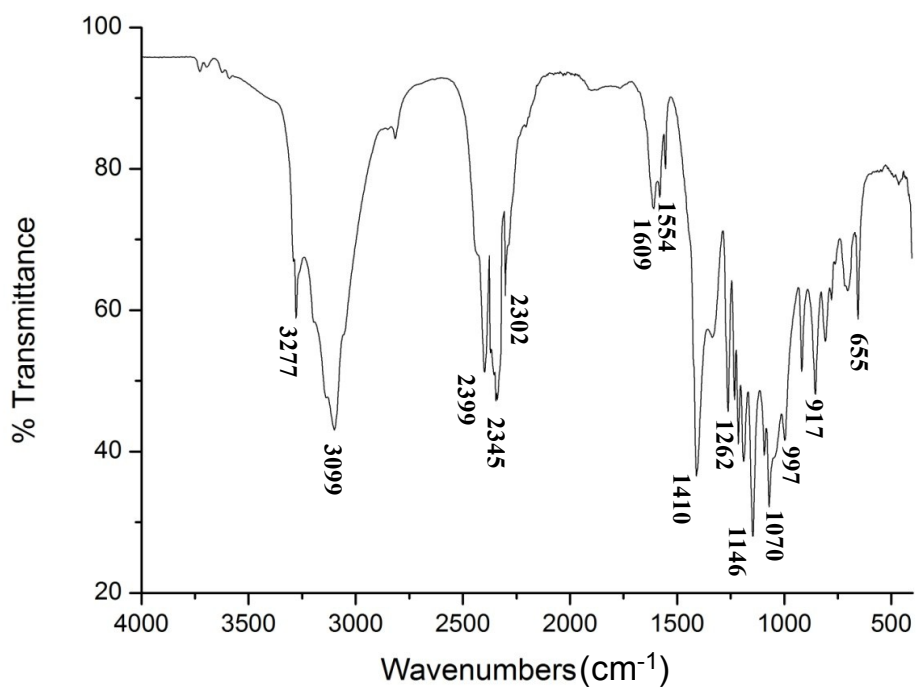

**Fig. S10** IR spectrum of the prepared  $[\text{NH}_3\text{BH}_2\text{NH}_2\text{BH}_2\text{NH}_3]\text{Cl}$ .

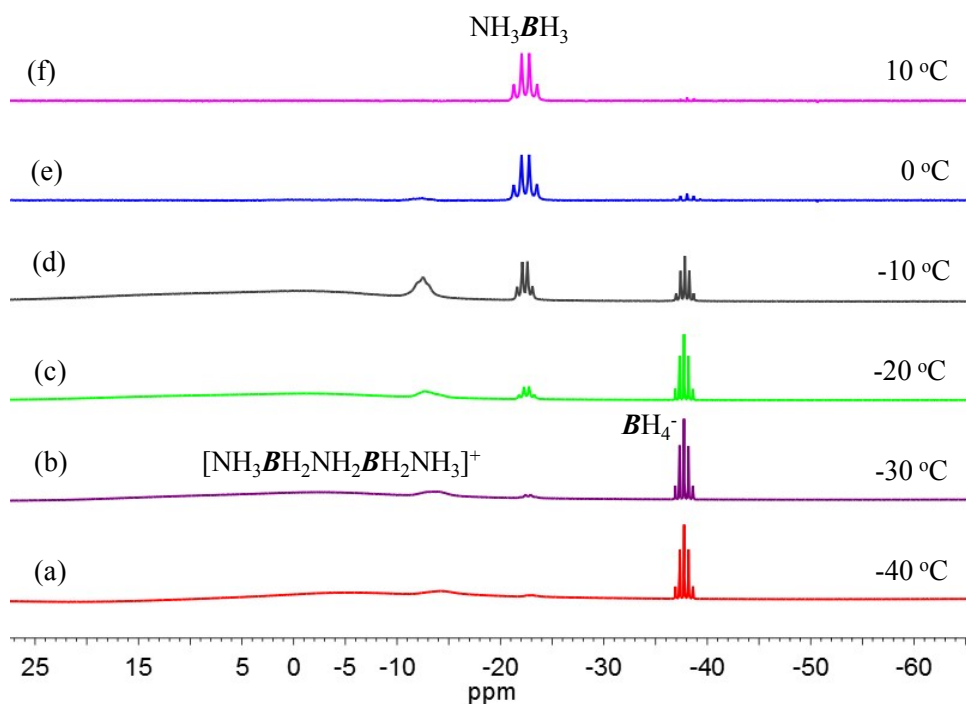

**Fig. S11** Variable temperature  $^{11}\text{B}$  NMR spectra of the prepared  $[\text{NH}_3\text{BH}_2\text{NH}_2\text{BH}_2\text{NH}_3]^+[\text{BH}_4]^-$  in THF.

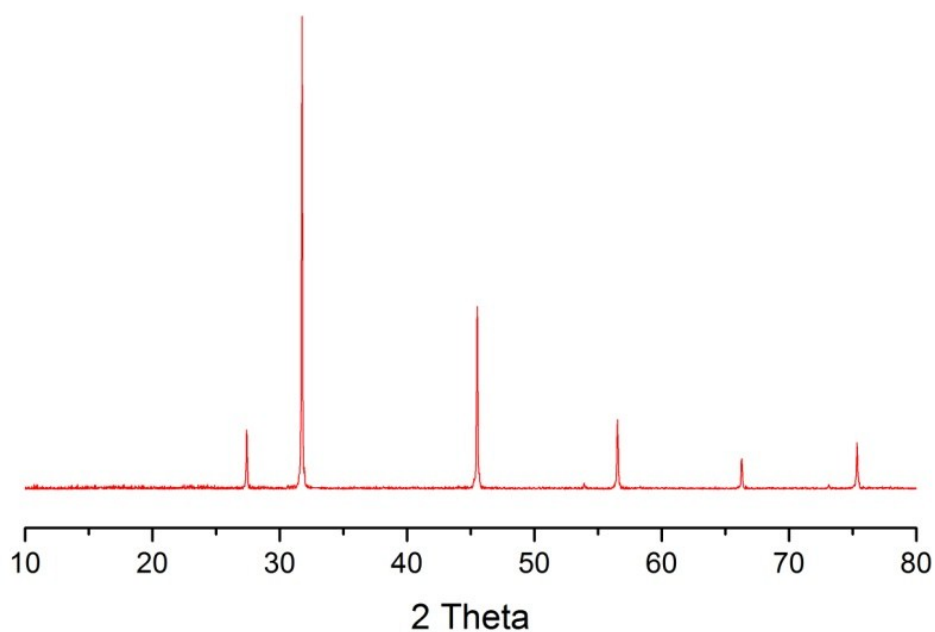

**Fig. S12** X-ray powder diffraction data of the NaCl isolated from the reaction of  $[\text{NH}_3\text{BH}_2\text{NH}_2\text{BH}_2\text{NH}_3]\text{Cl}$  with  $\text{NaBH}_4$ .

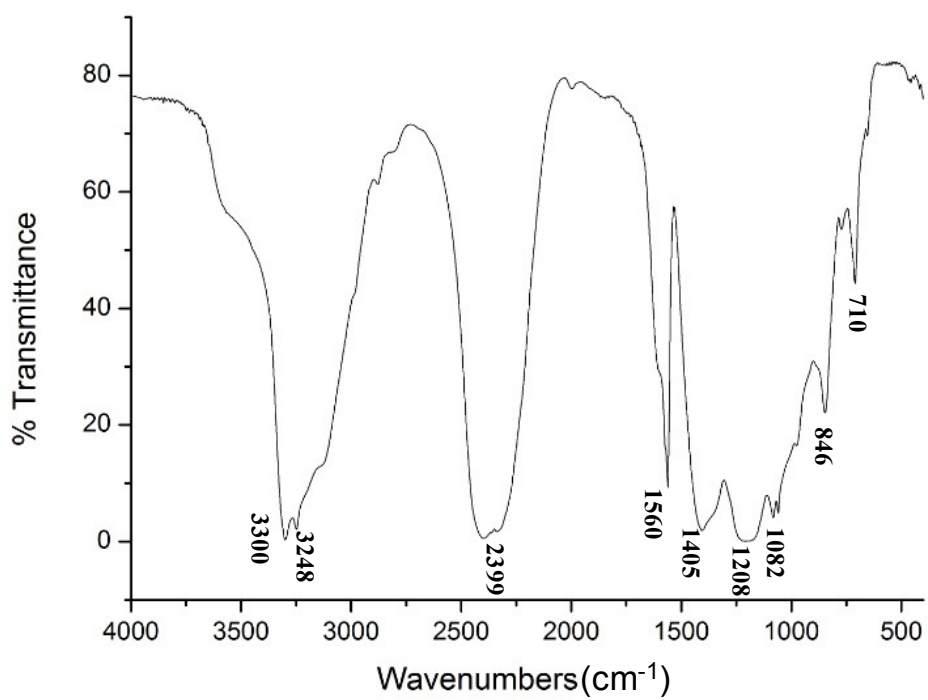

**Fig. S13** IR spectrum of the formed  $[\text{NH}_2\text{BH}_2]_n$ .

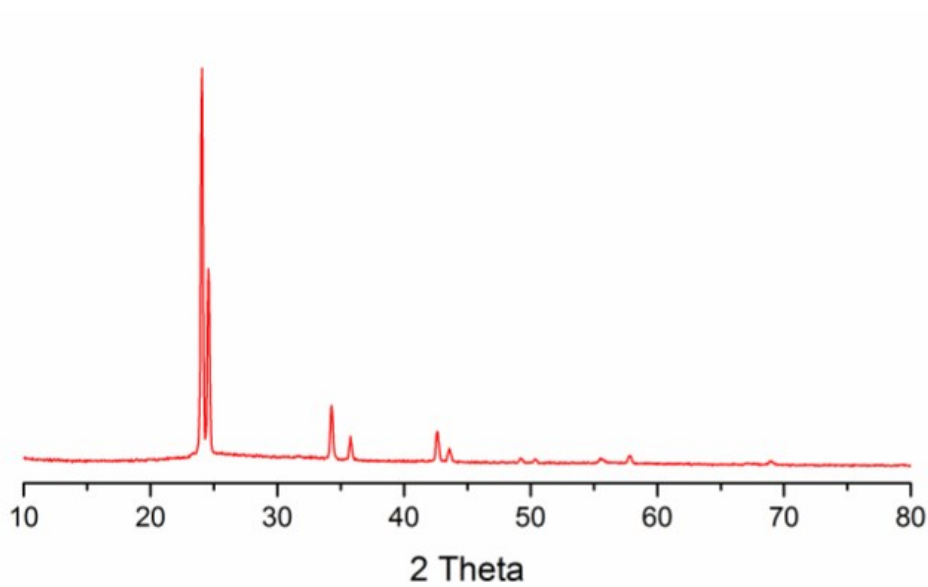

**Fig. S14** X-ray powder diffraction data of the formed  $\text{NH}_3\text{BH}_3$ .

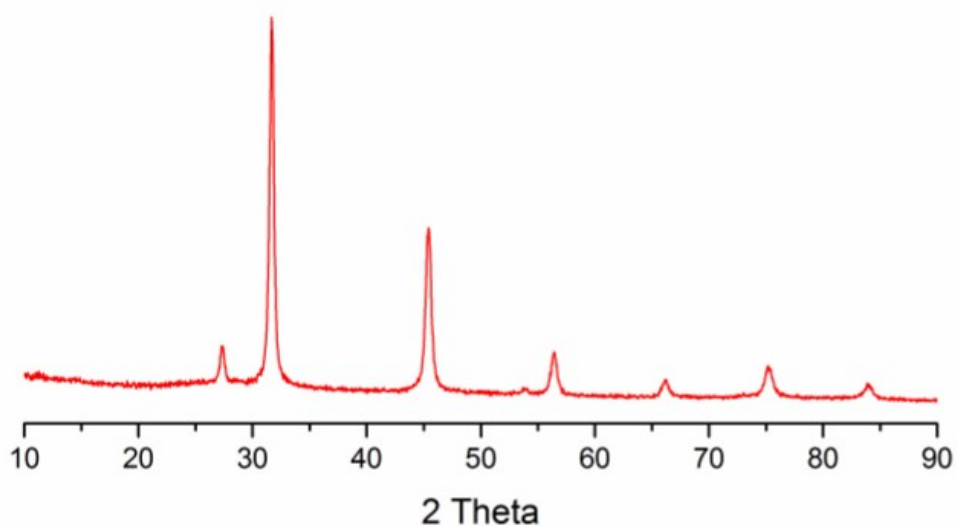

**Fig. S15** X-ray powder diffraction data of the NaCl isolated from the reaction of  $[\text{NH}_3\text{BH}_2\text{NH}_3]\text{Cl}$  with  $\text{Na}[\text{BH}_3\text{NH}_2\text{BH}_3]$ .

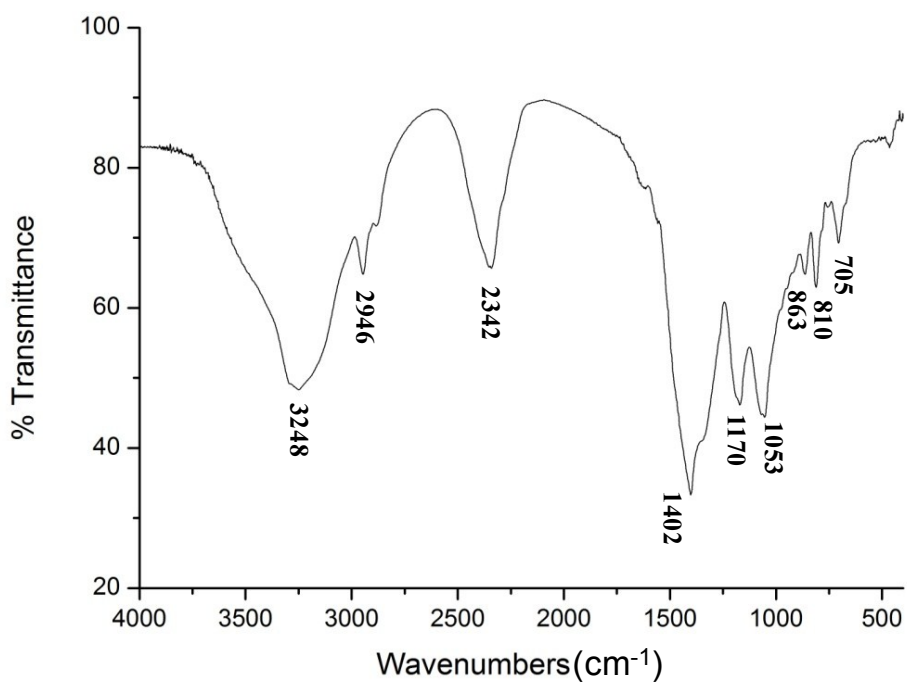

**Fig. S16** IR spectrum of the formed  $[\text{NH}_2\text{BH}_2]_n$  isolated from the reaction of  $[\text{NH}_3\text{BH}_2\text{NH}_3]\text{Cl}$  with  $\text{Na}[\text{BH}_3\text{NH}_2\text{BH}_3]$ .



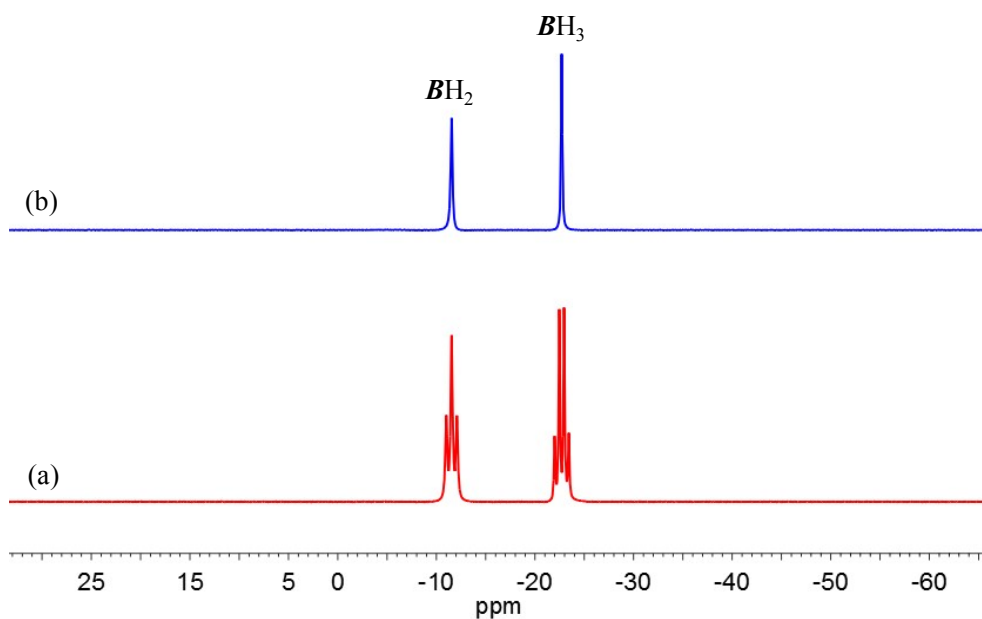

**Fig. S17**  $^{11}\text{B}$  NMR (a) and  $^{11}\text{B}\{^1\text{H}\}$  NMR (b) spectra of the  $\text{NH}_3\text{BH}_2\text{NH}_2\text{BH}_3$  in THF, which was isolated from the reaction of  $[\text{NH}_3\text{BH}_2\text{NH}_3]\text{Cl}$  with  $\text{Na}[\text{BH}_3\text{NH}_2\text{BH}_3]$ .

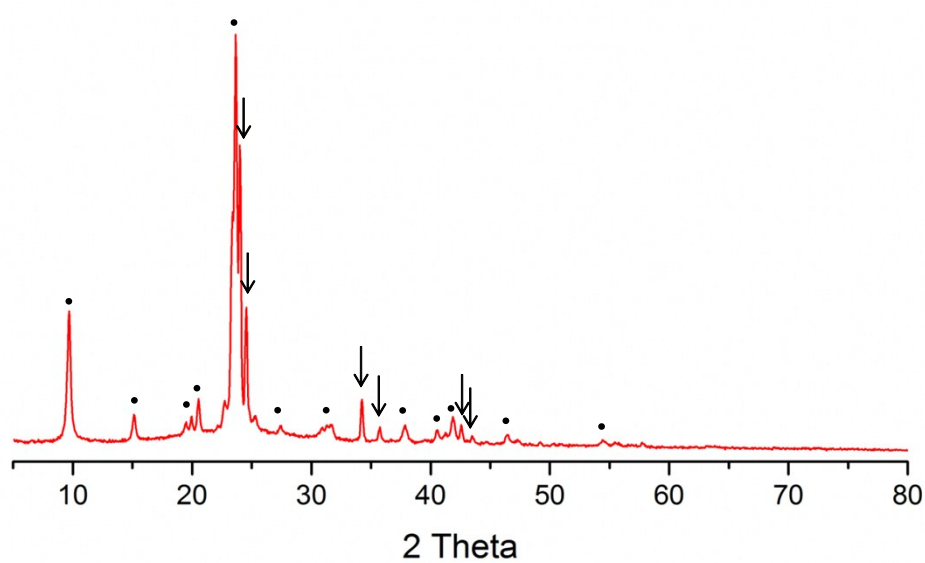

**Fig. S18** X-ray powder diffraction data of a mixture of  $\text{NH}_3\text{BH}_3$  ( $\downarrow$ ) and  $\text{NH}_3\text{BH}_2\text{NH}_2\text{BH}_2\text{NH}_3$  ( $\bullet$ ) isolated from the reaction of  $[\text{NH}_3\text{BH}_2\text{NH}_3]\text{Cl}$  and  $\text{Na}[\text{BH}_3\text{NH}_2\text{BH}_2\text{NH}_2\text{BH}_3]$ .

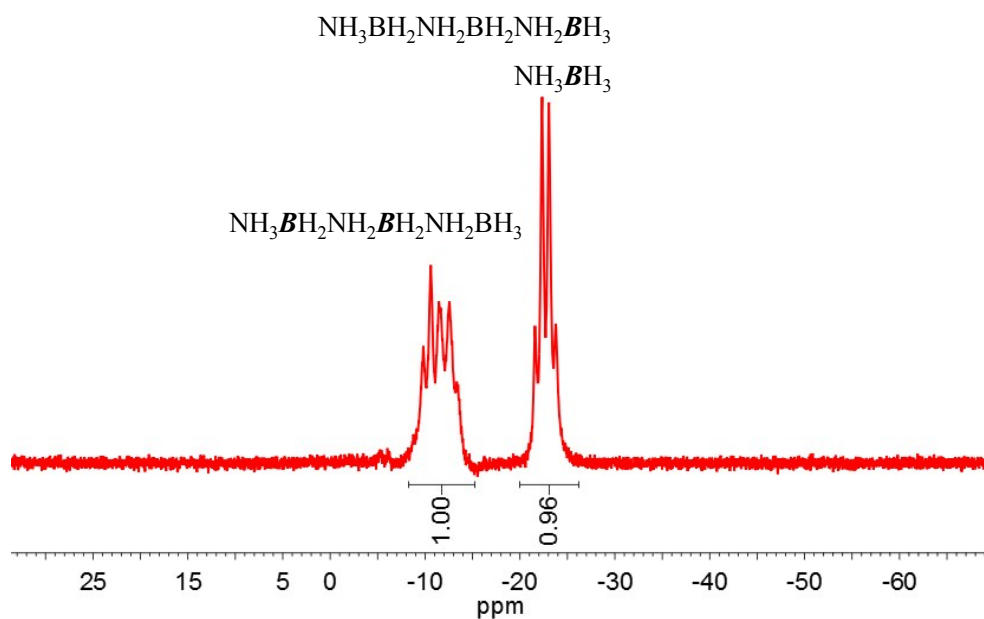

**Fig. S19**  $^{11}\text{B}$  NMR spectrum of the mixture of  $\text{NH}_3\text{BH}_3$  and  $\text{NH}_3\text{BH}_2\text{NH}_2\text{BH}_2\text{NH}_3$  in THF.

#### 4. References:

- 1 (a) J. Wang, X.-M. Chen, S.-C. Liu, J. Zhang, D. Wei and X. Chen, *Dalton Trans.*, 2019; (b) H. K. Lingam, X. Chen, J.-C. Zhao and S. G. Shore, *Chem. Eur. J.*, 2012, **18**, 3490-3492; (c) X. Chen, J.-C. Zhao and S. G. Shore, *J. Am. Chem. Soc.*, 2010, **132**, 10658-10659.
- 2 Y. Zhao and D. G. Truhlar, *Theor. Chem. Acc.*, 2008, **120**, 215-241.
- 3 Y. Zhao and D. G. Truhlar, *J. Chem. Theory Comput.*, 2008, **4**, 1849-1868.
- 4 Y. Zhao and D. G. Truhlar, *Acc. Chem. Res.*, 2008, **41**, 157-167.
- 5 M. J. Frisch, G. W. Trucks, H. B. Schlegel, G. E. Scuseria, M. A. Robb, J. R. Cheeseman, G. Scalmani, V. Barone, G. A. Petersson, H. Nakatsuji, X. Li, M. Caricato, A. V. Marenich, J. Bloino, B. G. Janesko, R. Gomperts, B. Mennucci, H. P. Hratchian, J. V. Ortiz, A. F. Izmaylov, J. L. Sonnenberg, D. Williams-Young, F. Ding, F. Lipparini, F. Egidi, J. Goings, B. Peng, A. Petrone, T. Henderson, D. Ranasinghe, V. G. Zakrzewski, J. Gao, N. Rega, G. Zheng, W. Liang, M. Hada, M. Ehara, K. Toyota, R. Fukuda, J. Hasegawa, M. Ishida, T. Nakajima, Y. Honda, O. Kitao, H. Nakai, T. Vreven, K. Throssell, J. A. Montgomery Jr., J. E. Peralta, F. Ogliaro, M. J. Bearpark, J. J. Heyd, E. N. Brothers, K. N. Kudin, V. N. Staroverov, T. A. Keith, R. Kobayashi, J. Normand, K. Raghavachari, A. P. Rendell, J. C. Burant, S. S. Iyengar, J. Tomasi, M. Cossi, J. M. Millam, M. Klene, C. Adamo, R. Cammi, J. W. Ochterski, R. L. Martin, K. Morokuma, O. Farkas, J. B. Foresman and D. J. Fox, Gaussian16, Gaussian, Inc., Wallingford, CT, 2016.
- 6 A. V. Marenich, C. J. Cramer and D. G. Truhlar, *J. Phys. Chem. B*, 2009, **113**, 6378-6396.
- 7 (a) C. Riplinger, P. Pinski, U. Becker, E. F. Valeev and F. Neese, *J. Chem. Phys.*, 2016, **144**, 024109; (b) D. G. Liakos and F. Neese, *J. Phys. Chem. A*, 2012, **116**, 4801; (C) C. Riplinger, F. Neese, *J. Chem. Phys.*, 2013, **138**, 034106.
- 8 (a) F. Neese and F. Wennmohs, ORCA(4.0.1)-An ab initio, DFT and semiempirical SCF-MO package, Max-Planck-Institute for Chemical Energy Conversion, Stiftstr. 34-36, 45470 Mulheim a. d. Ruhr, Germany; (b) F. Neese, *Wiley Interdiscip. Rev.: Comput. Mol. Sci.*, 2012, **2**, 73-78.
- 9 H. Li, N. Ma, W. Meng, J. Gallucci, Y. Qiu, S. Li, Q. Zhao, J. Zhang, J.-C. Zhao and X. Chen, *J. Am. Chem. Soc.*, 2015, **137**, 12406-12414.
- 10 W. Chen, H. Yu, G. Wu, T. He, Z. Li, Z. Guo, H. Liu, Z. Huang and P. Chen, *Chem. Eur. J.*, 2016, **22**, 7727-7729.

## 5. Geometrical Coordinates and Vibrational Frequencies of the Listed Compounds

### Formation of $\text{NH}_3\text{BH}_3$

#### DADB+THF

Zero-point correction= 0.260367 (Hartree/Particle)

Thermal correction to Energy= 0.275759

Thermal correction to Enthalpy= 0.276703

Thermal correction to Gibbs Free Energy= 0.2

B 4.93204800 0.13511895

Sum of electronic and zero-point Energies= -398.575993

Sum of electronic and thermal Energies= -398.560601

Sum of electronic and thermal Enthalpies= -398.559656

Sum of electronic and thermal Free Energies= -398.624464

Cartesian coordinates 38400 0.39350500

N 4.43720500 -1.10334200 -0.47003600

H 3.46247600 -1.36060000 -0.26391400

H 1.83943900 -0.38430900 1.00064600

H 6.03850200 0.44534900 0.04592100

H 4.83204600 -0.14586200 1.55564200

H 4.49784200 -0.94398600 -1.47672000

H 5.01340800 -1.92084900 -0.26710800

B 1.26928200 -0.73541100 -0.02828900

H 1.63092800 -1.87308300 -0.30907400

H 1.57963900 0.01665600 -0.94639600

H 0.06497900 -0.71821900 0.14027300

N 3.92789800 1.32397700 0.07446200

H 4.14634700 2.13635500 0.65157000

H 3.95991900 1.63279200 -0.89799300

H 2.95809300 1.04895800 0.27344400

C -4.14485200 -0.75179800 -0.15507900

O -3.80602100 0.31252300 -1.05253000

C -2.66311800 1.01455800 -0.55500100

C -2.58713300 0.67645400 0.92778500

C -3.05582400 -0.78015200 0.91681500

H -5.12706700 -0.53932300 0.28107400

H -4.21039800 -1.68569500 -0.71886400

H -1.76178600 0.66690100 -1.07431600

H -2.80127400 2.07840600 -0.75775600

H -1.58283600 0.80279800 1.33348800

H -3.28370300 1.29997300 1.49562600

H -2.23245800 -1.43006800 0.61027400

H -3.43273200 -1.12505800 1.88023700

Vibrational frequencies

2.1732 21.3854 37.8046

47.4883 56.4819 71.8354

|           |           |           |
|-----------|-----------|-----------|
| 83.7288   | 103.4589  | 131.9415  |
| 146.0268  | 198.2343  | 238.9759  |
| 262.4903  | 279.8453  | 286.3347  |
| 334.2745  | 364.9833  | 581.2760  |
| 675.8569  | 694.3770  | 748.5113  |
| 781.2771  | 797.6357  | 854.4508  |
| 858.7596  | 890.2356  | 925.1980  |
| 937.8694  | 948.8810  | 974.4266  |
| 1033.2874 | 1046.9698 | 1094.9485 |
| 1106.2430 | 1109.8230 | 1122.2264 |
| 1129.3711 | 1132.6337 | 1169.6933 |
| 1194.9396 | 1201.2899 | 1204.5908 |
| 1229.2705 | 1232.8773 | 1268.4288 |
| 1270.2089 | 1274.1895 | 1318.5622 |
| 1341.6281 | 1378.9253 | 1413.8322 |
| 1422.0571 | 1436.6627 | 1475.7167 |
| 1491.1894 | 1518.3804 | 1529.5211 |
| 1622.7934 | 1631.2090 | 1640.2170 |
| 1646.8354 | 2355.1170 | 2358.7903 |
| 2361.4480 | 2444.8466 | 2557.0634 |
| 2595.4156 | 3041.3943 | 3048.4562 |
| 3062.7471 | 3075.8267 | 3101.7746 |
| 3114.0689 | 3139.4335 | 3144.0783 |
| 3363.2929 | 3384.6591 | 3497.1644 |
| 3509.0318 | 3549.0386 | 3559.3777 |

## TS1

Zero-point correction= 0.254854 (Hartree/Particle)

Thermal correction to Energy= 0.269995

Thermal correction to Enthalpy= 0.270940

Thermal correction to Gibbs Free Energy= 0.207625

Sum of electronic and zero-point Energies= -398.533578

Sum of electronic and thermal Energies= -398.518437

Sum of electronic and thermal Enthalpies= -398.517492

Sum of electronic and thermal Free Energies= -398.580807

Cartesian coordinates

|   |            |             |             |
|---|------------|-------------|-------------|
| B | 4.51368800 | 0.40115000  | -0.01682700 |
| N | 3.23363100 | -0.25087500 | 0.45278100  |
| H | 2.05213300 | 1.20615500  | 0.33466400  |
| H | 0.62551100 | 0.88191400  | -0.93729800 |
| H | 4.95541600 | 1.17173900  | 0.81055200  |
| H | 4.38073600 | 0.91800100  | -1.10763600 |
| H | 2.81306500 | -0.91874000 | -0.18477500 |
| H | 3.25333900 | -0.66148100 | 1.37969100  |
| B | 0.63725100 | 1.52626700  | 0.07272700  |
| H | 1.88730600 | 2.01722300  | 0.27259600  |

|   |             |             |             |
|---|-------------|-------------|-------------|
| H | 0.26561100  | 0.97380800  | 1.06815400  |
| H | 0.27423400  | 2.66487900  | -0.04534500 |
| N | 5.70308100  | -0.71260400 | -0.22924800 |
| H | 6.57252300  | -0.28360200 | -0.54555000 |
| H | 5.90708600  | -1.21238400 | 0.63543400  |
| H | 5.43950700  | -1.40962400 | -0.92538800 |
| C | -3.75716600 | 0.88537500  | -0.14960600 |
| O | -2.36039800 | 0.68778800  | -0.38188500 |
| C | -2.03455800 | -0.69743800 | -0.23180400 |
| C | -3.36576000 | -1.43871100 | -0.12667100 |
| C | -4.24924900 | -0.38206800 | 0.53987300  |
| H | -3.88442500 | 1.78770400  | 0.45200300  |
| H | -4.26721100 | 1.03029500  | -1.11005200 |
| H | -1.43206400 | -1.01259100 | -1.08656300 |
| H | -1.43851000 | -0.82537500 | 0.67883400  |
| H | -3.75121400 | -1.67656900 | -1.12203000 |
| H | -3.28295200 | -2.36390800 | 0.44498800  |
| H | -5.31724400 | -0.55013800 | 0.39567500  |
| H | -4.04094900 | -0.33528800 | 1.61214500  |

Vibrational frequencies

|           |           |           |
|-----------|-----------|-----------|
| -45.0262  | 11.3543   | 18.6188   |
| 24.6982   | 43.7609   | 61.2172   |
| 71.7821   | 75.9302   | 88.7497   |
| 118.4165  | 168.6861  | 203.1470  |
| 212.9068  | 276.3647  | 318.2024  |
| 345.2799  | 429.9496  | 581.0652  |
| 657.1984  | 664.4861  | 670.4102  |
| 674.3210  | 749.5948  | 816.6447  |
| 845.1823  | 858.2403  | 887.0952  |
| 890.0809  | 924.1775  | 939.8991  |
| 947.0242  | 974.9841  | 1000.4800 |
| 1042.4602 | 1044.9400 | 1048.5447 |
| 1098.2958 | 1131.2909 | 1134.4599 |
| 1153.1439 | 1170.2096 | 1182.9372 |
| 1195.8347 | 1198.8744 | 1199.1829 |
| 1205.6380 | 1225.6900 | 1266.5923 |
| 1271.7431 | 1315.5438 | 1341.5452 |
| 1371.4517 | 1376.0492 | 1409.8671 |
| 1477.1274 | 1488.9156 | 1519.0432 |
| 1530.2685 | 1598.3812 | 1631.2885 |
| 1637.8474 | 1750.5466 | 2447.4183 |
| 2457.2693 | 2537.6433 | 2608.5412 |
| 2627.3390 | 3034.2282 | 3045.8125 |
| 3061.3552 | 3067.5469 | 3103.3568 |
| 3115.6422 | 3125.4636 | 3133.2899 |
| 3202.7271 | 3453.5048 | 3540.8102 |

3552.7952            3562.1706            3623.4319

**NH<sub>3</sub>BH<sub>2</sub>NH<sub>2</sub>+BH<sub>3</sub>·H<sub>2</sub>**

Zero-point correction=            0.136429 (Hartree/Particle)  
Thermal correction to Energy=        0.145699  
Thermal correction to Enthalpy=      0.146643  
Thermal correction to Gibbs Free Energy=    0.101530  
Sum of electronic and zero-point Energies=    -166.237474  
Sum of electronic and thermal Energies=      -166.228205  
Sum of electronic and thermal Enthalpies=    -166.227260  
Sum of electronic and thermal Free Energies=   -166.272374

Cartesian coordinates

|   |                 |                 |                 |
|---|-----------------|-----------------|-----------------|
| B | -0.927761000000 | 0.564616000000  | -0.154631000000 |
| N | 0.099739000000  | -0.537363000000 | -0.168941000000 |
| H | 1.923417000000  | 0.387243000000  | -0.337861000000 |
| H | 2.850140000000  | 0.001711000000  | 1.307761000000  |
| H | -1.037745000000 | 1.106506000000  | -1.236086000000 |
| H | -0.730350000000 | 1.367233000000  | 0.736216000000  |
| H | 0.252756000000  | -1.025532000000 | 0.706949000000  |
| H | 0.017312000000  | -1.224464000000 | -0.909746000000 |
| B | 3.228240000000  | 0.047634000000  | 0.171515000000  |
| H | 2.474280000000  | 0.962497000000  | -0.528704000000 |
| H | 3.268834000000  | -0.975957000000 | -0.452105000000 |
| H | 4.144151000000  | 0.795990000000  | -0.023583000000 |
| N | -2.433820000000 | -0.027938000000 | 0.161405000000  |
| H | -3.139113000000 | 0.707341000000  | 0.178229000000  |
| H | -2.722981000000 | -0.709941000000 | -0.538777000000 |
| H | -2.464529000000 | -0.496774000000 | 1.066036000000  |

Vibrational frequencies

|           |           |           |
|-----------|-----------|-----------|
| 8.2296    | 40.1995   | 109.9988  |
| 128.1842  | 198.4229  | 215.1336  |
| 258.8949  | 348.4416  | 399.1511  |
| 601.9398  | 632.2000  | 653.6267  |
| 660.4711  | 802.7678  | 839.7023  |
| 908.6246  | 1002.0543 | 1040.0731 |
| 1059.6770 | 1095.4276 | 1130.5398 |
| 1165.9325 | 1197.1652 | 1203.0670 |
| 1207.5947 | 1226.4194 | 1368.0020 |
| 1595.4547 | 1631.4280 | 1640.5215 |
| 1728.3460 | 2441.5965 | 2451.6921 |
| 2537.6673 | 2611.9083 | 2622.9968 |
| 3368.3346 | 3456.9415 | 3546.2780 |
| 3558.6560 | 3563.0386 | 3628.7435 |

**THF**

Zero-point correction= 0.117331 (Hartree/Particle)  
 Thermal correction to Energy= 0.122231  
 Thermal correction to Enthalpy= 0.123175  
 Thermal correction to Gibbs Free Energy= 0.089014  
 Sum of electronic and zero-point Energies= -232.296366  
 Sum of electronic and thermal Energies= -232.291467  
 Sum of electronic and thermal Enthalpies= -232.290523  
 Sum of electronic and thermal Free Energies= -232.324683

Cartesian coordinates

|   |                 |                 |                 |
|---|-----------------|-----------------|-----------------|
| C | 1.162903000000  | 0.423464000000  | 0.137330000000  |
| O | -0.000035000000 | 1.246856000000  | -0.000079000000 |
| C | -1.162959000000 | 0.423387000000  | -0.137229000000 |
| C | -0.726362000000 | -0.988827000000 | 0.239051000000  |
| C | 0.726456000000  | -0.988746000000 | -0.239097000000 |
| H | 1.950067000000  | 0.820955000000  | -0.506953000000 |
| H | 1.508572000000  | 0.462911000000  | 1.177120000000  |
| H | -1.950004000000 | 0.820793000000  | 0.507254000000  |
| H | -1.508863000000 | 0.462876000000  | -1.176935000000 |
| H | -0.766691000000 | -1.123646000000 | 1.323403000000  |
| H | -1.342032000000 | -1.755530000000 | -0.232472000000 |
| H | 1.342187000000  | -1.755444000000 | 0.232356000000  |
| H | 0.766809000000  | -1.123440000000 | -1.323465000000 |

Vibrational frequencies

|           |           |           |
|-----------|-----------|-----------|
| 55.0388   | 272.9302  | 578.5435  |
| 672.4291  | 855.8555  | 890.8293  |
| 918.2878  | 933.3753  | 945.4841  |
| 973.3062  | 1040.9647 | 1128.6646 |
| 1169.3671 | 1192.9542 | 1198.5374 |
| 1266.8590 | 1271.0291 | 1313.3648 |
| 1342.4283 | 1378.1290 | 1411.7311 |
| 1478.4258 | 1488.9574 | 1516.1921 |
| 1527.6348 | 3040.6340 | 3046.3474 |
| 3064.3031 | 3066.9940 | 3101.6811 |
| 3103.1737 | 3125.2282 | 3132.8735 |

### pre-TS2

Zero-point correction= 0.256510 (Hartree/Particle)  
 Thermal correction to Energy= 0.271718  
 Thermal correction to Enthalpy= 0.272662  
 Thermal correction to Gibbs Free Energy= 0.214391  
 Sum of electronic and zero-point Energies= -398.539047  
 Sum of electronic and thermal Energies= -398.523839  
 Sum of electronic and thermal Enthalpies= -398.522895  
 Sum of electronic and thermal Free Energies= -398.581166

Cartesian coordinates

|   |            |            |             |
|---|------------|------------|-------------|
| B | 0.69349300 | 2.36443200 | -0.42233500 |
|---|------------|------------|-------------|



|   |             |             |             |
|---|-------------|-------------|-------------|
| H | 0.08085100  | 3.30761700  | -0.83863600 |
| H | 0.38638800  | 1.31084900  | -0.89478200 |
| H | 1.73408800  | 2.93120700  | -1.16772000 |
| N | 2.67277400  | -0.73282300 | -1.25968900 |
| H | 2.04095900  | 2.26698300  | -0.83641400 |
| H | 2.53218600  | -1.73332600 | -1.33976100 |
| B | 3.13963800  | -0.24071600 | 0.08586800  |
| H | 0.96599500  | 2.39793900  | 0.74104400  |
| H | 4.10465700  | -0.86106000 | 0.48918700  |
| H | 1.85655000  | -0.26581300 | -1.63759800 |
| H | 3.35045900  | 0.95881900  | 0.09403700  |
| N | 1.99344400  | -0.46360400 | 1.24670100  |
| H | 2.27262400  | -0.04960500 | 2.13594300  |
| H | 1.83823100  | -1.45664700 | 1.41895700  |
| H | 1.07630200  | -0.07139900 | 1.00142800  |
| C | -1.93520400 | 0.63378700  | 0.92143900  |
| O | -0.90812600 | -0.37025100 | 0.87441900  |
| C | -1.10094400 | -1.21052800 | -0.27193700 |
| C | -2.53353400 | -0.96258000 | -0.72509900 |
| C | -2.69660600 | 0.52354300  | -0.39572300 |
| H | -2.58571400 | 0.42043000  | 1.77596400  |
| H | -1.46674400 | 1.60913200  | 1.07065800  |
| H | -0.38787000 | -0.92258900 | -1.05437200 |
| H | -0.90347700 | -2.24356700 | 0.02142300  |
| H | -2.68156700 | -1.19342100 | -1.78010000 |
| H | -3.22728900 | -1.56350100 | -0.13101400 |
| H | -2.21685700 | 1.13434700  | -1.16494400 |
| H | -3.73621100 | 0.83670100  | -0.29748300 |

Vibrational frequencies

|           |           |           |
|-----------|-----------|-----------|
| 36.2558   | 58.9569   | 74.5196   |
| 82.1025   | 96.3644   | 101.5299  |
| 122.9271  | 147.7356  | 176.2388  |
| 190.0196  | 202.6040  | 215.8958  |
| 237.4839  | 254.6190  | 282.2940  |
| 343.6677  | 370.7977  | 415.3541  |
| 582.2947  | 600.1361  | 661.1804  |
| 677.8366  | 684.1956  | 811.6154  |
| 843.6323  | 861.8756  | 881.1989  |
| 890.3594  | 930.7838  | 935.1623  |
| 951.4389  | 979.9816  | 1002.9393 |
| 1027.8783 | 1035.3634 | 1050.5385 |
| 1095.5128 | 1123.1939 | 1135.0239 |
| 1167.9848 | 1171.7333 | 1193.9337 |
| 1198.1473 | 1198.8477 | 1204.4892 |
| 1213.4216 | 1243.0340 | 1272.2728 |
| 1277.0561 | 1319.0687 | 1345.1322 |

|           |           |           |
|-----------|-----------|-----------|
| 1383.0737 | 1391.3304 | 1417.7102 |
| 1475.7905 | 1487.8788 | 1517.5857 |
| 1535.8704 | 1600.9473 | 1633.3368 |
| 1658.3901 | 1760.8918 | 2425.6963 |
| 2450.7244 | 2565.3009 | 2643.0268 |
| 2666.8700 | 3040.5839 | 3060.8190 |
| 3068.1672 | 3072.0102 | 3115.1931 |
| 3123.8251 | 3132.4417 | 3141.5026 |
| 3380.0831 | 3505.9248 | 3551.2300 |
| 3558.5437 | 3619.7285 | 3633.7855 |

## TS2

Zero-point correction= 0.253837 (Hartree/Particle)

Thermal correction to Energy= 0.268772

Thermal correction to Enthalpy= 0.269716

Thermal correction to Gibbs Free Energy= 0.210981

Sum of electronic and zero-point Energies= -398.536234

Sum of electronic and thermal Energies= -398.521300

Sum of electronic and thermal Enthalpies= -398.520356

Sum of electronic and thermal Free Energies= -398.579090

Cartesian coordinates

|   |                 |                 |                 |
|---|-----------------|-----------------|-----------------|
| B | 0.373538000000  | 1.884876000000  | -0.534875000000 |
| H | -0.680765000000 | 2.304731000000  | -0.905546000000 |
| H | 0.974810000000  | 1.130533000000  | -1.232832000000 |
| H | 0.927961000000  | 3.464159000000  | -1.187507000000 |
| N | 3.432542000000  | -0.622662000000 | -1.019483000000 |
| H | 1.588602000000  | 3.115739000000  | -1.057695000000 |
| H | 3.498941000000  | -1.631192000000 | -1.089079000000 |
| B | 3.403936000000  | -0.044395000000 | 0.370479000000  |
| H | 0.712250000000  | 2.056977000000  | 0.593661000000  |
| H | 4.328125000000  | -0.446277000000 | 1.053311000000  |
| H | 2.706445000000  | -0.300110000000 | -1.647964000000 |
| H | 3.335469000000  | 1.169469000000  | 0.361338000000  |
| N | 2.058958000000  | -0.523291000000 | 1.204344000000  |
| H | 2.033823000000  | -0.110205000000 | 2.136412000000  |
| H | 2.047461000000  | -1.535054000000 | 1.327253000000  |
| H | 1.180452000000  | -0.267930000000 | 0.740694000000  |
| C | -1.861070000000 | 0.347328000000  | 1.098656000000  |
| O | -0.787393000000 | -0.111937000000 | 0.258939000000  |
| C | -1.319648000000 | -0.798099000000 | -0.890006000000 |
| C | -2.811526000000 | -0.961836000000 | -0.621337000000 |
| C | -3.108851000000 | 0.274740000000  | 0.230331000000  |
| H | -1.940558000000 | -0.316060000000 | 1.966434000000  |
| H | -1.617862000000 | 1.354785000000  | 1.440634000000  |
| H | -1.139243000000 | -0.179064000000 | -1.774618000000 |
| H | -0.788267000000 | -1.744958000000 | -1.004268000000 |

|   |                 |                 |                 |
|---|-----------------|-----------------|-----------------|
| H | -3.391538000000 | -1.005139000000 | -1.543080000000 |
| H | -2.999090000000 | -1.871549000000 | -0.045058000000 |
| H | -3.177941000000 | 1.164080000000  | -0.402196000000 |
| H | -4.021229000000 | 0.189040000000  | 0.820686000000  |

Vibrational frequencies

|           |           |           |
|-----------|-----------|-----------|
| -439.6335 | 18.7608   | 30.7866   |
| 51.8041   | 74.6717   | 95.4465   |
| 123.0028  | 139.1833  | 150.9149  |
| 181.7501  | 231.3240  | 269.8129  |
| 274.7511  | 294.4140  | 305.5364  |
| 317.1538  | 344.9838  | 359.2381  |
| 420.2759  | 572.4329  | 577.6383  |
| 648.7610  | 666.8368  | 679.8241  |
| 803.7752  | 844.9098  | 855.9466  |
| 868.1210  | 890.2439  | 899.9288  |
| 923.8398  | 926.3664  | 945.1556  |
| 971.9355  | 1002.4218 | 1044.5282 |
| 1052.0866 | 1093.7428 | 1111.8526 |
| 1128.3919 | 1139.2150 | 1165.6797 |
| 1167.2714 | 1168.7380 | 1173.4404 |
| 1196.0723 | 1202.7837 | 1222.7554 |
| 1269.0247 | 1271.4401 | 1314.4431 |
| 1341.7515 | 1375.9002 | 1383.4263 |
| 1406.0306 | 1476.9082 | 1488.4514 |
| 1512.8560 | 1525.4763 | 1597.7053 |
| 1639.9441 | 1661.5258 | 2435.2406 |
| 2445.5634 | 2592.8549 | 2695.1280 |
| 2711.3134 | 3053.7039 | 3062.5937 |
| 3069.0281 | 3074.5572 | 3114.9173 |
| 3121.0436 | 3135.6470 | 3143.8206 |
| 3397.6120 | 3512.8103 | 3552.7377 |
| 3561.0121 | 3636.9176 | 4211.8234 |

## H<sub>2</sub>

Zero-point correction= 0.010160 (Hartree/Particle)

Thermal correction to Energy= 0.012520

Thermal correction to Enthalpy= 0.013465

Thermal correction to Gibbs Free Energy= -0.001322

Sum of electronic and zero-point Energies= -1.157686

Sum of electronic and thermal Energies= -1.155326

Sum of electronic and thermal Enthalpies= -1.154382

Sum of electronic and thermal Free Energies= -1.169168

Cartesian coordinates

|   |                |                |                 |
|---|----------------|----------------|-----------------|
| H | 0.000000000000 | 0.000000000000 | 0.370405000000  |
| H | 0.000000000000 | 0.000000000000 | -0.370405000000 |

Vibrational frequencies

4459.6822

**NH<sub>3</sub>BH<sub>2</sub>NH<sub>2</sub>+THF·BH<sub>3</sub>**

Zero-point correction= 0.240618 (Hartree/Particle)

Thermal correction to Energy= 0.254141

Thermal correction to Enthalpy= 0.255085

Thermal correction to Gibbs Free Energy= 0.198304

Sum of electronic and zero-point Energies= -397.407934

Sum of electronic and thermal Energies= -397.394411

Sum of electronic and thermal Enthalpies= -397.393467

Sum of electronic and thermal Free Energies= -397.450248

Cartesian coordinates

|   |                 |                 |                 |
|---|-----------------|-----------------|-----------------|
| B | -0.083648000000 | -0.155791000000 | -0.321798000000 |
| H | 0.083604000000  | -0.405182000000 | 0.855980000000  |
| H | 0.403827000000  | 0.899381000000  | -0.653069000000 |
| N | 5.314521000000  | 0.812280000000  | -0.070135000000 |
| H | 5.274012000000  | 1.034516000000  | -1.057744000000 |
| B | 4.702275000000  | -0.498111000000 | 0.344394000000  |
| H | 0.222936000000  | -1.073841000000 | -1.044906000000 |
| H | 5.113777000000  | -1.430364000000 | -0.318673000000 |
| H | 5.023705000000  | 1.628297000000  | 0.455313000000  |
| H | 4.807593000000  | -0.698557000000 | 1.539269000000  |
| N | 3.070686000000  | -0.509132000000 | 0.080332000000  |
| H | 2.634815000000  | -1.386866000000 | 0.363277000000  |
| H | 2.845609000000  | -0.369503000000 | -0.904412000000 |
| H | 2.599806000000  | 0.234465000000  | 0.595697000000  |
| C | -2.492589000000 | -1.143138000000 | -0.291984000000 |
| O | -1.640595000000 | 0.029668000000  | -0.514110000000 |
| C | -2.243443000000 | 1.213591000000  | 0.085993000000  |
| C | -3.715142000000 | 0.864078000000  | 0.142794000000  |
| C | -3.669944000000 | -0.620616000000 | 0.517867000000  |
| H | -2.777315000000 | -1.503322000000 | -1.280274000000 |
| H | -1.894863000000 | -1.893214000000 | 0.223497000000  |
| H | -1.807751000000 | 1.342399000000  | 1.080302000000  |
| H | -1.986623000000 | 2.057130000000  | -0.551389000000 |
| H | -4.244832000000 | 1.472534000000  | 0.874794000000  |
| H | -4.176290000000 | 1.004045000000  | -0.837606000000 |
| H | -3.472029000000 | -0.731490000000 | 1.585930000000  |
| H | -4.588100000000 | -1.153786000000 | 0.274507000000  |

Vibrational frequencies

|          |          |          |
|----------|----------|----------|
| 30.2398  | 38.4760  | 47.5028  |
| 60.7111  | 72.5577  | 80.6595  |
| 92.0042  | 200.9024 | 225.7993 |
| 256.8262 | 283.1474 | 306.3598 |
| 333.0465 | 348.6293 | 511.9015 |

|           |           |           |
|-----------|-----------|-----------|
| 563.3836  | 577.0289  | 646.6821  |
| 660.3260  | 747.3137  | 800.0055  |
| 836.6530  | 860.9605  | 874.8588  |
| 912.0357  | 928.7832  | 947.0219  |
| 948.4906  | 966.7276  | 999.4217  |
| 1002.9702 | 1061.3228 | 1096.3751 |
| 1104.9098 | 1132.7441 | 1165.1521 |
| 1168.0216 | 1193.7649 | 1196.8058 |
| 1204.6040 | 1206.1275 | 1223.5141 |
| 1228.7674 | 1268.8833 | 1284.0348 |
| 1329.2050 | 1359.2356 | 1368.7003 |
| 1397.1130 | 1416.7330 | 1478.8500 |
| 1490.9423 | 1509.8876 | 1519.8287 |
| 1601.0054 | 1629.3623 | 1637.0580 |
| 2445.9076 | 2448.9962 | 2454.1699 |
| 2503.5266 | 2529.7318 | 3085.0870 |
| 3092.7414 | 3103.1326 | 3106.3363 |
| 3145.8825 | 3152.4697 | 3171.3918 |
| 3179.3975 | 3459.0863 | 3551.3122 |
| 3556.0977 | 3564.7140 | 3634.7954 |

### TS3

Zero-point correction= 0.239894 (Hartree/Particle)

Thermal correction to Energy= 0.252649

Thermal correction to Enthalpy= 0.253593

Thermal correction to Gibbs Free Energy= 0.199739

Sum of electronic and zero-point Energies= -397.390731

Sum of electronic and thermal Energies= -397.377977

Sum of electronic and thermal Enthalpies= -397.377033

Sum of electronic and thermal Free Energies= -397.430886

Cartesian coordinates

|   |                |                 |                 |
|---|----------------|-----------------|-----------------|
| B | 0.358627000000 | -0.700088000000 | -0.459919000000 |
| H | 0.334700000000 | -0.163235000000 | 0.610636000000  |
| H | 0.566288000000 | -0.048387000000 | -1.440983000000 |
| N | 2.763724000000 | -0.838982000000 | -0.246283000000 |
| H | 2.994602000000 | -1.003412000000 | -1.219766000000 |
| B | 3.226447000000 | 0.471629000000  | 0.336484000000  |
| H | 0.316719000000 | -1.893400000000 | -0.527670000000 |
| H | 2.836024000000 | 1.423699000000  | -0.309261000000 |
| H | 2.998086000000 | -1.670728000000 | 0.283687000000  |
| H | 2.954831000000 | 0.565595000000  | 1.516130000000  |
| N | 4.872519000000 | 0.595011000000  | 0.283081000000  |
| H | 5.205037000000 | 1.469216000000  | 0.689624000000  |
| H | 5.215812000000 | 0.557057000000  | -0.676017000000 |
| H | 5.318384000000 | -0.166627000000 | 0.793247000000  |

|   |                 |                 |                 |
|---|-----------------|-----------------|-----------------|
| C | -2.399629000000 | -1.087131000000 | 0.417303000000  |
| O | -1.650421000000 | -0.504963000000 | -0.667578000000 |
| C | -2.026407000000 | 0.876007000000  | -0.836236000000 |
| C | -3.303746000000 | 1.051519000000  | -0.028291000000 |
| C | -3.061345000000 | 0.083159000000  | 1.132125000000  |
| H | -3.140540000000 | -1.770522000000 | -0.007991000000 |
| H | -1.707308000000 | -1.653326000000 | 1.042211000000  |
| H | -1.218355000000 | 1.502320000000  | -0.444252000000 |
| H | -2.141907000000 | 1.067298000000  | -1.903593000000 |
| H | -3.448442000000 | 2.084177000000  | 0.289608000000  |
| H | -4.173373000000 | 0.737185000000  | -0.611580000000 |
| H | -2.367747000000 | 0.524018000000  | 1.853165000000  |
| H | -3.971751000000 | -0.212451000000 | 1.653613000000  |

Vibrational frequencies

|           |           |           |
|-----------|-----------|-----------|
| -408.6144 | 36.1730   | 41.2552   |
| 66.1481   | 83.0284   | 104.0581  |
| 130.8537  | 171.3533  | 208.5778  |
| 240.9874  | 272.8220  | 291.8341  |
| 301.6591  | 349.2962  | 443.3413  |
| 579.8819  | 629.7743  | 651.0743  |
| 663.0389  | 669.1474  | 803.4970  |
| 834.3045  | 854.6176  | 889.5718  |
| 904.8827  | 911.1487  | 923.0350  |
| 936.6066  | 948.6584  | 980.2938  |
| 1001.9347 | 1045.1766 | 1095.5981 |
| 1108.1306 | 1115.6763 | 1132.2271 |
| 1153.0489 | 1156.3946 | 1167.4030 |
| 1170.8078 | 1200.6220 | 1207.7553 |
| 1224.8655 | 1271.0955 | 1274.8851 |
| 1320.8194 | 1351.6327 | 1358.6905 |
| 1381.4816 | 1409.4992 | 1478.6709 |
| 1487.8913 | 1510.4896 | 1522.4265 |
| 1598.5881 | 1636.2839 | 1642.0435 |
| 2455.3847 | 2467.2661 | 2548.6371 |
| 2641.4192 | 2643.9950 | 3058.0835 |
| 3071.0217 | 3078.1473 | 3081.2845 |
| 3126.1604 | 3129.3884 | 3136.2655 |
| 3144.9420 | 3461.4420 | 3548.4118 |
| 3562.3929 | 3569.0887 | 3632.9954 |

**NH<sub>3</sub>BH<sub>2</sub>NH<sub>2</sub>BH<sub>3</sub>**

Zero-point correction= 0.123984 (Hartree/Particle)

Thermal correction to Energy= 0.130379

Thermal correction to Enthalpy= 0.131323

Thermal correction to Gibbs Free Energy= 0.095262

Sum of electronic and zero-point Energies= -165.134112

Sum of electronic and thermal Energies= -165.127717

Sum of electronic and thermal Enthalpies= -165.126773

Sum of electronic and thermal Free Energies= -165.162834

Cartesian coordinates

|   |                 |                 |                 |
|---|-----------------|-----------------|-----------------|
| B | 2.124112000000  | 0.130741000000  | -0.000083000000 |
| H | 2.901751000000  | -0.805953000000 | 0.000202000000  |
| H | 2.251910000000  | 0.805664000000  | 1.002359000000  |
| N | 0.628106000000  | -0.462641000000 | 0.000077000000  |
| H | 0.534628000000  | -1.072191000000 | 0.811790000000  |
| B | -0.487434000000 | 0.625732000000  | 0.000074000000  |
| H | 2.252186000000  | 0.805035000000  | -1.002897000000 |
| H | -0.437106000000 | 1.278531000000  | 1.010237000000  |
| H | 0.534177000000  | -1.072431000000 | -0.811405000000 |
| H | -0.436953000000 | 1.278551000000  | -1.010088000000 |
| N | -1.915211000000 | -0.126871000000 | -0.000063000000 |
| H | -2.671970000000 | 0.557336000000  | 0.000601000000  |
| H | -2.050965000000 | -0.715716000000 | 0.822397000000  |
| H | -2.051320000000 | -0.714605000000 | -0.823250000000 |

Vibrational frequencies

|           |           |           |
|-----------|-----------|-----------|
| 104.8762  | 168.9884  | 224.5598  |
| 230.2338  | 361.6846  | 647.2946  |
| 712.0362  | 719.0994  | 780.9919  |
| 847.4276  | 855.0268  | 873.1941  |
| 1012.7314 | 1074.9662 | 1108.8332 |
| 1169.2207 | 1186.7574 | 1202.9412 |
| 1206.6064 | 1220.0834 | 1229.3488 |
| 1237.9741 | 1405.3265 | 1608.5751 |
| 1632.8412 | 1637.5757 | 2419.0292 |
| 2451.9615 | 2460.0951 | 2533.2854 |
| 2561.2266 | 3443.5786 | 3478.7555 |
| 3534.4778 | 3539.5873 | 3541.5293 |

#### TS4

Zero-point correction= 0.237305 (Hartree/Particle)

Thermal correction to Energy= 0.251333

Thermal correction to Enthalpy= 0.252277

Thermal correction to Gibbs Free Energy= 0.195469

Sum of electronic and zero-point Energies= -397.397419

Sum of electronic and thermal Energies= -397.383392

Sum of electronic and thermal Enthalpies= -397.382447

Sum of electronic and thermal Free Energies= -397.439256

Cartesian coordinates

|   |                 |                 |                |
|---|-----------------|-----------------|----------------|
| B | -0.430681000000 | -1.997003000000 | 0.878642000000 |
| H | -1.133672000000 | -2.121291000000 | 1.859076000000 |
| H | 0.733018000000  | -1.805138000000 | 1.143073000000 |

|   |                 |                 |                 |
|---|-----------------|-----------------|-----------------|
| N | 3.090245000000  | 0.537915000000  | 1.007620000000  |
| H | 2.841925000000  | 1.460941000000  | 1.328669000000  |
| B | 3.477467000000  | 0.259135000000  | -0.316893000000 |
| H | -0.599667000000 | -2.866599000000 | 0.056354000000  |
| H | 3.705138000000  | 1.174621000000  | -1.049494000000 |
| H | 2.936737000000  | -0.181432000000 | 1.698150000000  |
| H | 3.869967000000  | -0.837701000000 | -0.579013000000 |
| N | 1.518888000000  | -0.341368000000 | -1.600771000000 |
| H | 1.904015000000  | -0.637986000000 | -2.493315000000 |
| H | 0.730762000000  | 0.267900000000  | -1.802855000000 |
| H | 1.143232000000  | -1.167928000000 | -1.142687000000 |
| C | -2.230781000000 | -0.634781000000 | -0.446108000000 |
| O | -0.900745000000 | -0.667626000000 | 0.160681000000  |
| C | -0.596002000000 | 0.604719000000  | 0.796059000000  |
| C | -1.430074000000 | 1.583532000000  | -0.002614000000 |
| C | -2.723889000000 | 0.790701000000  | -0.223459000000 |
| H | -2.090709000000 | -0.886284000000 | -1.497728000000 |
| H | -2.838542000000 | -1.395460000000 | 0.042913000000  |
| H | -0.909756000000 | 0.543946000000  | 1.842285000000  |
| H | 0.483288000000  | 0.734690000000  | 0.727674000000  |
| H | -1.590358000000 | 2.516312000000  | 0.536754000000  |
| H | -0.940763000000 | 1.805571000000  | -0.955053000000 |
| H | -3.346621000000 | 0.836765000000  | 0.671889000000  |
| H | -3.305414000000 | 1.148563000000  | -1.072090000000 |

Vibrational frequencies

|           |           |           |
|-----------|-----------|-----------|
| -152.1645 | 25.3675   | 42.4550   |
| 58.0956   | 68.5193   | 76.8742   |
| 101.6150  | 134.4010  | 186.1148  |
| 212.4442  | 227.6205  | 240.3780  |
| 277.9645  | 292.1384  | 299.0048  |
| 370.1450  | 477.4938  | 487.6108  |
| 497.3602  | 580.4229  | 726.3226  |
| 754.7400  | 853.8936  | 874.3919  |
| 877.9784  | 907.4757  | 935.5317  |
| 944.4977  | 946.2306  | 961.7521  |
| 999.1992  | 1013.4423 | 1062.9361 |
| 1099.2581 | 1113.6179 | 1115.1532 |
| 1129.2102 | 1164.1459 | 1194.8767 |
| 1198.4323 | 1200.4349 | 1205.5446 |
| 1223.9491 | 1262.0774 | 1282.2390 |
| 1308.4180 | 1326.5300 | 1354.4134 |
| 1393.3496 | 1411.5475 | 1478.5790 |
| 1489.1639 | 1513.1790 | 1522.4979 |
| 1610.4863 | 1635.9427 | 1644.7648 |
| 2474.1154 | 2505.2704 | 2524.5228 |
| 2598.1088 | 2654.6767 | 3070.5177 |



|           |           |           |
|-----------|-----------|-----------|
| 3085.8158 | 3092.6162 | 3102.0888 |
| 3141.8417 | 3148.7097 | 3167.4920 |
| 3175.0672 | 3484.1962 | 3606.9528 |
| 3612.7192 | 3614.6245 | 3713.4532 |

### **NH<sub>2</sub>BH<sub>2</sub>**

Zero-point correction= 0.070504 (Hartree/Particle)  
 Thermal correction to Energy= 0.074203  
 Thermal correction to Enthalpy= 0.075147  
 Thermal correction to Gibbs Free Energy= 0.048163  
 Sum of electronic and zero-point Energies= -83.137892  
 Sum of electronic and thermal Energies= -83.134193  
 Sum of electronic and thermal Enthalpies= -83.133249  
 Sum of electronic and thermal Free Energies= -83.160234

#### Cartesian coordinates

|   |                 |                 |                 |
|---|-----------------|-----------------|-----------------|
| N | 0.610231000000  | -0.000001000000 | 0.000036000000  |
| H | 1.164555000000  | 0.844173000000  | -0.000106000000 |
| H | 1.164515000000  | -0.844206000000 | -0.000109000000 |
| B | -0.776533000000 | -0.000002000000 | 0.000016000000  |
| H | -1.358976000000 | 1.040282000000  | -0.000060000000 |
| H | -1.359045000000 | -1.040230000000 | -0.000058000000 |

#### Vibrational frequencies

|           |           |           |
|-----------|-----------|-----------|
| 605.7851  | 737.8214  | 840.3543  |
| 1011.1225 | 1117.6854 | 1160.3313 |
| 1358.8005 | 1619.9571 | 2620.6165 |
| 2684.6208 | 3602.9197 | 3700.3977 |

### **NH<sub>3</sub>+ THF·BH<sub>3</sub>**

Zero-point correction= 0.186755 (Hartree/Particle)  
 Thermal correction to Energy= 0.197949  
 Thermal correction to Enthalpy= 0.198893  
 Thermal correction to Gibbs Free Energy= 0.148345  
 Sum of electronic and zero-point Energies= -315.418617  
 Sum of electronic and thermal Energies= -315.407423  
 Sum of electronic and thermal Enthalpies= -315.406479  
 Sum of electronic and thermal Free Energies= -315.457026

#### Cartesian coordinates

|   |                |                 |                 |
|---|----------------|-----------------|-----------------|
| B | 1.301940000000 | 0.108569000000  | -0.174420000000 |
| H | 1.437342000000 | -0.085935000000 | 1.017220000000  |
| H | 1.664884000000 | 1.208700000000  | -0.517786000000 |
| H | 1.755415000000 | -0.782842000000 | -0.852010000000 |
| N | 4.587252000000 | -0.149660000000 | 0.174298000000  |
| H | 5.193449000000 | 0.604340000000  | 0.491999000000  |
| H | 4.160796000000 | 0.194683000000  | -0.681567000000 |
| H | 3.833631000000 | -0.192235000000 | 0.855774000000  |

|   |                 |                 |                 |
|---|-----------------|-----------------|-----------------|
| C | -0.958386000000 | -1.183308000000 | -0.231480000000 |
| O | -0.257666000000 | 0.085280000000  | -0.445301000000 |
| C | -1.041099000000 | 1.189379000000  | 0.088690000000  |
| C | -2.460242000000 | 0.667136000000  | 0.019974000000  |
| C | -2.275821000000 | -0.797591000000 | 0.430814000000  |
| H | -1.083126000000 | -1.630722000000 | -1.216916000000 |
| H | -0.320782000000 | -1.812809000000 | 0.388032000000  |
| H | -0.713249000000 | 1.368783000000  | 1.116650000000  |
| H | -0.830502000000 | 2.056439000000  | -0.533609000000 |
| H | -3.125910000000 | 1.216209000000  | 0.684653000000  |
| H | -2.838081000000 | 0.739620000000  | -1.002603000000 |
| H | -2.188802000000 | -0.874649000000 | 1.516331000000  |
| H | -3.090910000000 | -1.440752000000 | 0.100271000000  |

#### Vibrational frequencies

|           |           |           |
|-----------|-----------|-----------|
| 30.6438   | 52.3198   | 54.9451   |
| 74.8703   | 88.4776   | 129.8981  |
| 178.5159  | 225.7753  | 241.5223  |
| 282.6394  | 302.1395  | 504.2312  |
| 579.9267  | 751.1988  | 858.5786  |
| 877.2337  | 913.9342  | 927.9791  |
| 944.6030  | 951.6547  | 971.4585  |
| 998.4170  | 1061.6818 | 1108.0517 |
| 1132.4371 | 1166.5124 | 1190.8516 |
| 1197.0277 | 1204.1328 | 1205.9610 |
| 1224.6173 | 1269.5337 | 1282.5509 |
| 1327.0478 | 1354.2288 | 1394.7221 |
| 1416.1022 | 1478.0830 | 1489.7063 |
| 1512.4015 | 1527.6212 | 1639.0956 |
| 1649.3506 | 2459.5303 | 2502.2044 |
| 2530.2426 | 3077.0942 | 3084.3909 |
| 3089.1976 | 3127.1737 | 3141.2335 |
| 3148.2822 | 3177.9294 | 3191.4230 |
| 3484.7679 | 3586.1624 | 3603.6733 |

#### TS5

Zero-point correction= 0.185990 (Hartree/Particle)

Thermal correction to Energy= 0.196220

Thermal correction to Enthalpy= 0.197164

Thermal correction to Gibbs Free Energy= 0.150360

Sum of electronic and zero-point Energies= -315.402300

Sum of electronic and thermal Energies= -315.392070

Sum of electronic and thermal Enthalpies= -315.391126

Sum of electronic and thermal Free Energies= -315.437931

Cartesian coordinates

|   |                |                |                 |
|---|----------------|----------------|-----------------|
| B | 1.669595000000 | 0.043150000000 | -0.249615000000 |
|---|----------------|----------------|-----------------|

|   |                 |                 |                 |
|---|-----------------|-----------------|-----------------|
| H | 1.402415000000  | -0.238786000000 | 0.883179000000  |
| H | 1.815009000000  | 1.189450000000  | -0.555155000000 |
| H | 1.892390000000  | -0.823762000000 | -1.040647000000 |
| N | 3.965247000000  | -0.014202000000 | 0.343469000000  |
| H | 4.253598000000  | -0.923028000000 | 0.693678000000  |
| H | 4.540848000000  | 0.190109000000  | -0.468192000000 |
| H | 4.201098000000  | 0.669686000000  | 1.056514000000  |
| C | -1.008007000000 | -1.140532000000 | -0.438066000000 |
| O | -0.327670000000 | 0.093055000000  | -0.741172000000 |
| C | -1.005130000000 | 1.194264000000  | -0.106750000000 |
| C | -2.354810000000 | 0.643180000000  | 0.330991000000  |
| C | -1.990798000000 | -0.803130000000 | 0.674858000000  |
| H | -1.524537000000 | -1.476635000000 | -1.342024000000 |
| H | -0.258223000000 | -1.881659000000 | -0.156714000000 |
| H | -0.409480000000 | 1.514812000000  | 0.754354000000  |
| H | -1.067722000000 | 2.012869000000  | -0.824653000000 |
| H | -2.773411000000 | 1.198809000000  | 1.170279000000  |
| H | -3.065885000000 | 0.668751000000  | -0.498992000000 |
| H | -1.490503000000 | -0.845920000000 | 1.646116000000  |
| H | -2.846464000000 | -1.478162000000 | 0.689222000000  |

#### Vibrational frequencies

|           |           |           |
|-----------|-----------|-----------|
| -404.7745 | 44.8637   | 90.6107   |
| 108.5150  | 126.8301  | 156.6146  |
| 183.9380  | 201.9581  | 247.0738  |
| 278.1680  | 360.6238  | 369.7174  |
| 573.7652  | 668.9480  | 853.1521  |
| 886.1309  | 904.9577  | 909.6130  |
| 922.1062  | 932.5445  | 947.3058  |
| 976.4168  | 1043.7144 | 1091.7423 |
| 1112.3058 | 1115.9538 | 1152.1269 |
| 1157.4984 | 1169.6052 | 1197.5128 |
| 1208.0898 | 1272.0307 | 1273.8888 |
| 1316.8833 | 1347.9421 | 1381.4363 |
| 1408.7211 | 1474.7321 | 1485.7934 |
| 1514.8586 | 1526.3973 | 1635.8936 |
| 1636.7009 | 2552.4384 | 2642.4987 |
| 2651.1886 | 3064.1257 | 3065.6312 |
| 3069.9717 | 3073.8990 | 3122.8275 |
| 3126.2757 | 3135.8358 | 3141.9319 |
| 3491.8490 | 3613.8390 | 3620.1262 |

#### **NH<sub>3</sub>BH<sub>3</sub>**

Zero-point correction= 0.070504 (Hartree/Particle)

Thermal correction to Energy= 0.074203

Thermal correction to Enthalpy= 0.075147

Thermal correction to Gibbs Free Energy= 0.048163

Sum of electronic and zero-point Energies= -83.137892

Sum of electronic and thermal Energies= -83.134193

Sum of electronic and thermal Enthalpies= -83.133249

Sum of electronic and thermal Free Energies= -83.160234

Cartesian coordinates

|   |                 |                 |                 |
|---|-----------------|-----------------|-----------------|
| N | 0.000000000000  | 0.000000000000  | 0.713715000000  |
| H | 0.000000000000  | 0.945663000000  | 1.092759000000  |
| H | 0.818968000000  | -0.472831000000 | 1.092759000000  |
| H | -0.818968000000 | -0.472831000000 | 1.092759000000  |
| B | 0.000000000000  | 0.000000000000  | -0.902502000000 |
| H | 0.000000000000  | -1.159431000000 | -1.253924000000 |
| H | -1.004096000000 | 0.579715000000  | -1.253924000000 |
| H | 1.004096000000  | 0.579715000000  | -1.253924000000 |

Vibrational frequencies

|           |           |           |
|-----------|-----------|-----------|
| 281.9080  | 708.0780  | 714.3194  |
| 765.1036  | 1075.8939 | 1077.9102 |
| 1191.6924 | 1207.1700 | 1209.4486 |
| 1396.7021 | 1643.9385 | 1646.9041 |
| 2465.6374 | 2484.8311 | 2487.1770 |
| 3468.7239 | 3561.0580 | 3561.3555 |

## AADB

Zero-point correction= 0.141839 (Hartree/Particle)

Thermal correction to Energy= 0.150226

Thermal correction to Enthalpy= 0.151170

Thermal correction to Gibbs Free Energy= 0.110629

Sum of electronic and zero-point Energies= -166.266445

Sum of electronic and thermal Energies= -166.258058

Sum of electronic and thermal Enthalpies= -166.257114

Sum of electronic and thermal Free Energies= -166.297655

Cartesian coordinates

|   |                 |                 |                 |
|---|-----------------|-----------------|-----------------|
| N | -1.524641000000 | -0.019826000000 | -0.000143000000 |
| B | -0.726941000000 | 1.350948000000  | -0.002473000000 |
| B | -0.658012000000 | -1.354433000000 | 0.000240000000  |
| N | 2.256087000000  | 0.019518000000  | 0.000747000000  |
| H | -1.395051000000 | -2.323115000000 | -0.046625000000 |
| H | 2.299151000000  | -0.258991000000 | -0.981530000000 |
| H | -2.148246000000 | -0.037366000000 | 0.804747000000  |
| H | -2.147554000000 | -0.034970000000 | -0.805646000000 |
| H | 0.073981000000  | -1.330370000000 | -0.976985000000 |
| H | 0.003517000000  | -1.374251000000 | 1.026796000000  |
| H | 1.403596000000  | 0.589397000000  | 0.146484000000  |
| H | 3.090541000000  | 0.551859000000  | 0.252412000000  |
| H | 2.179051000000  | -0.819861000000 | 0.579416000000  |
| H | -1.495047000000 | 2.291846000000  | 0.048622000000  |

H 0.000555000000 1.364380000000 0.982979000000  
H -0.059855000000 1.401028000000 -1.023732000000

Vibrational frequencies

|           |           |           |
|-----------|-----------|-----------|
| 107.2438  | 135.8355  | 151.9818  |
| 177.5601  | 184.4813  | 239.1825  |
| 274.6556  | 334.0483  | 358.9186  |
| 625.3949  | 734.8658  | 826.6585  |
| 831.6494  | 908.9857  | 1019.8689 |
| 1063.0113 | 1160.9404 | 1194.4758 |
| 1201.4512 | 1207.7604 | 1213.0639 |
| 1222.8995 | 1227.8187 | 1263.7824 |
| 1416.5847 | 1441.2316 | 1471.9759 |
| 1605.3475 | 1676.9710 | 1698.0208 |
| 2363.2544 | 2390.9846 | 2391.7991 |
| 2407.5064 | 2416.4990 | 2438.4485 |
| 3258.5322 | 3459.8037 | 3501.1542 |
| 3538.5960 | 3555.8172 | 3561.0707 |

**TS6**

Zero-point correction= 0.136987 (Hartree/Particle)

Thermal correction to Energy= 0.145153

Thermal correction to Enthalpy= 0.146097

Thermal correction to Gibbs Free Energy= 0.104732

Sum of electronic and zero-point Energies= -166.238105

Sum of electronic and thermal Energies= -166.229939

Sum of electronic and thermal Enthalpies= -166.228995

Sum of electronic and thermal Free Energies= -166.270360

Cartesian coordinates

|   |                 |                 |                 |
|---|-----------------|-----------------|-----------------|
| B | 2.229573000000  | -0.513453000000 | 0.268347000000  |
| H | 2.652473000000  | -1.527215000000 | -0.252847000000 |
| H | 2.027063000000  | -0.676765000000 | 1.454646000000  |
| N | 0.808794000000  | -0.164788000000 | -0.416909000000 |
| H | 0.189543000000  | -0.961719000000 | -0.275618000000 |
| B | 0.190449000000  | 1.128435000000  | 0.142815000000  |
| H | 2.970551000000  | 0.427932000000  | 0.071703000000  |
| H | -0.108052000000 | 1.060957000000  | 1.296862000000  |
| H | 0.948202000000  | -0.094772000000 | -1.423365000000 |
| H | 0.765637000000  | 2.118615000000  | -0.202019000000 |
| N | -2.419775000000 | -0.379003000000 | 0.077032000000  |
| H | -2.567022000000 | -1.049117000000 | -0.673642000000 |
| H | -3.313619000000 | 0.074950000000  | 0.249218000000  |
| H | -2.190950000000 | -0.908294000000 | 0.915286000000  |
| H | -0.893971000000 | 1.462327000000  | -0.599542000000 |
| H | -1.303098000000 | 0.804730000000  | -0.237352000000 |

Vibrational frequencies

|           |           |           |
|-----------|-----------|-----------|
| -218.5199 | 33.1745   | 67.3755   |
| 112.2590  | 184.3643  | 249.2954  |
| 288.8665  | 363.0523  | 419.6994  |
| 648.6799  | 662.2754  | 774.0189  |
| 808.8191  | 852.6311  | 915.6500  |
| 993.6443  | 1016.6255 | 1069.4010 |
| 1143.5396 | 1161.5811 | 1177.9983 |
| 1186.9158 | 1199.4802 | 1201.6977 |
| 1218.3227 | 1228.7608 | 1238.3003 |
| 1612.6933 | 1627.2293 | 1633.4288 |
| 1782.7727 | 2440.3735 | 2455.8139 |
| 2464.8249 | 2598.6123 | 2661.1815 |
| 2892.8024 | 3488.4584 | 3490.4550 |
| 3550.0811 | 3606.7368 | 3608.4694 |

### **NH<sub>3</sub>**

Zero-point correction= 0.034409 (Hartree/Particle)

Thermal correction to Energy= 0.037277

Thermal correction to Enthalpy= 0.038221

Thermal correction to Gibbs Free Energy= 0.015341

Sum of electronic and zero-point Energies= -56.516885

Sum of electronic and thermal Energies= -56.514018

Sum of electronic and thermal Enthalpies= -56.513074

Sum of electronic and thermal Free Energies= -56.535954

Cartesian coordinates

|   |                 |                 |                 |
|---|-----------------|-----------------|-----------------|
| N | -0.000024000000 | 0.000023000000  | -0.113781000000 |
| H | -0.929789000000 | 0.148294000000  | 0.265542000000  |
| H | 0.593512000000  | 0.730672000000  | 0.265495000000  |
| H | 0.336447000000  | -0.879128000000 | 0.265433000000  |

Vibrational frequencies

|           |           |           |
|-----------|-----------|-----------|
| 1058.2805 | 1637.7081 | 1640.1328 |
| 3507.4871 | 3629.5186 | 3630.8310 |

### **BH<sub>3</sub>NH<sub>2</sub>BH<sub>2</sub>·H<sub>2</sub>**

Zero-point correction= 0.098524 (Hartree/Particle)

Thermal correction to Energy= 0.104625

Thermal correction to Enthalpy= 0.105569

Thermal correction to Gibbs Free Energy= 0.069671

Sum of electronic and zero-point Energies= -109.717220

Sum of electronic and thermal Energies= -109.711118

Sum of electronic and thermal Enthalpies= -109.710174

Sum of electronic and thermal Free Energies= -109.746073

Cartesian coordinates

|   |                 |                 |                 |
|---|-----------------|-----------------|-----------------|
| B | -1.446004000000 | -0.275087000000 | -0.000354000000 |
| H | -2.341806000000 | 0.541968000000  | 0.004860000000  |

|   |                 |                 |                 |
|---|-----------------|-----------------|-----------------|
| H | -1.456403000000 | -0.960561000000 | 1.000029000000  |
| N | -0.043308000000 | 0.547572000000  | 0.000121000000  |
| H | -0.036514000000 | 1.156117000000  | 0.816511000000  |
| B | 1.122976000000  | -0.428152000000 | 0.001211000000  |
| H | -1.460177000000 | -0.952374000000 | -1.006227000000 |
| H | 1.307062000000  | -1.012569000000 | 1.021222000000  |
| H | -0.036022000000 | 1.155598000000  | -0.816660000000 |
| H | 1.303039000000  | -1.019479000000 | -1.015625000000 |
| H | 2.320001000000  | 0.383076000000  | -0.396236000000 |
| H | 2.319114000000  | 0.391416000000  | 0.387001000000  |

#### Vibrational frequencies

|           |           |           |
|-----------|-----------|-----------|
| 12.3635   | 198.0645  | 285.3546  |
| 296.0367  | 532.4162  | 649.5178  |
| 652.5858  | 779.8479  | 798.5683  |
| 880.5971  | 977.1522  | 1024.2298 |
| 1081.7558 | 1122.2010 | 1168.8285 |
| 1196.0752 | 1197.6505 | 1202.9590 |
| 1206.3863 | 1220.2431 | 1443.7488 |
| 1611.5504 | 2454.3251 | 2471.6671 |
| 2479.5298 | 2642.8472 | 2708.5539 |
| 3509.6759 | 3570.9213 | 3871.3914 |

#### TS7

Zero-point correction= 0.217281 (Hartree/Particle)

Thermal correction to Energy= 0.228892

Thermal correction to Enthalpy= 0.229836

Thermal correction to Gibbs Free Energy= 0.179075

Sum of electronic and zero-point Energies= -342.018868

Sum of electronic and thermal Energies= -342.007257

Sum of electronic and thermal Enthalpies= -342.006313

Sum of electronic and thermal Free Energies= -342.057075

#### Cartesian coordinates

|   |             |             |             |
|---|-------------|-------------|-------------|
| B | 3.77116400  | -0.05851100 | -0.17902300 |
| H | 4.23193700  | -0.88061700 | -0.93869200 |
| H | 4.22580000  | -0.15104700 | 0.93985700  |
| N | 2.16581200  | -0.37886900 | -0.05605100 |
| H | 2.05641700  | -1.28061200 | 0.40325000  |
| B | 1.27930500  | 0.67294900  | 0.56814000  |
| H | 3.85239900  | 1.07394600  | -0.61001300 |
| H | 1.03793200  | 1.63413700  | -0.08560000 |
| H | 1.82022700  | -0.50812700 | -1.00670300 |
| H | 0.63716900  | 0.40580900  | 1.53385200  |
| C | -1.26755000 | -1.26404000 | 0.16736600  |
| O | -0.56507400 | -0.41915400 | -0.74334900 |
| C | -1.48844800 | 0.59088000  | -1.13951500 |
| C | -2.19836600 | 0.97971900  | 0.15435300  |

|   |             |             |             |
|---|-------------|-------------|-------------|
| C | -2.25761000 | -0.35597900 | 0.92658200  |
| H | -1.79504700 | -2.04287700 | -0.39590700 |
| H | -0.52796200 | -1.74070000 | 0.81459300  |
| H | -0.92251400 | 1.39979200  | -1.60344300 |
| H | -2.19330000 | 0.17813800  | -1.87412200 |
| H | -1.59381100 | 1.70939500  | 0.69718800  |
| H | -3.18340200 | 1.41242200  | -0.02485000 |
| H | -1.96388300 | -0.22516700 | 1.96875500  |
| H | -3.26059800 | -0.78526300 | 0.91175700  |
| H | 2.34428500  | 1.34763300  | 1.81467300  |
| H | 2.61375300  | 1.68278300  | 1.19625000  |

Vibrational frequencies

|           |           |           |
|-----------|-----------|-----------|
| -399.9580 | 20.1142   | 53.2715   |
| 87.2843   | 108.4651  | 131.1116  |
| 144.0582  | 185.4321  | 225.3746  |
| 287.7003  | 317.2933  | 336.4208  |
| 368.1683  | 557.3865  | 614.9631  |
| 671.2088  | 690.4722  | 716.7151  |
| 792.7267  | 813.8481  | 877.4591  |
| 895.1025  | 927.4887  | 936.4205  |
| 952.2845  | 960.9396  | 975.8860  |
| 991.9876  | 1035.2365 | 1055.2190 |
| 1058.1101 | 1118.3798 | 1130.4271 |
| 1149.7053 | 1174.7641 | 1191.9240 |
| 1202.0319 | 1207.9989 | 1217.1252 |
| 1224.9085 | 1242.4591 | 1243.3017 |
| 1249.0844 | 1292.2305 | 1313.0123 |
| 1327.6092 | 1376.2624 | 1410.5322 |
| 1470.8347 | 1488.0577 | 1509.9475 |
| 1523.8837 | 1619.5945 | 2448.5745 |
| 2475.6613 | 2487.4858 | 2658.1287 |
| 2742.0544 | 3041.4115 | 3046.0593 |
| 3072.3837 | 3078.5069 | 3107.0637 |
| 3122.9802 | 3133.2422 | 3140.2425 |
| 3502.5492 | 3566.2085 | 4280.7565 |

**THFBH<sub>2</sub>NH<sub>2</sub>BH<sub>3</sub>**

Zero-point correction= 0.204239 (Hartree/Particle)

Thermal correction to Energy= 0.213807

Thermal correction to Enthalpy= 0.214752

Thermal correction to Gibbs Free Energy= 0.169140

Sum of electronic and zero-point Energies= -340.899714

Sum of electronic and thermal Energies= -340.890145

Sum of electronic and thermal Enthalpies= -340.889201

Sum of electronic and thermal Free Energies= -340.934812



Cartesian coordinates

|   |                 |                 |                 |
|---|-----------------|-----------------|-----------------|
| B | 2.654295000000  | -0.209235000000 | 1.137700000000  |
| H | 3.697123000000  | -0.817927000000 | 1.295016000000  |
| H | 1.736970000000  | -0.772224000000 | 1.700670000000  |
| N | 2.336285000000  | -0.177303000000 | -0.438299000000 |
| H | 2.245428000000  | -1.132654000000 | -0.783090000000 |
| B | 1.141094000000  | 0.697808000000  | -0.912524000000 |
| H | 2.757190000000  | 0.942222000000  | 1.514156000000  |
| H | 0.842671000000  | 0.479346000000  | -2.064225000000 |
| H | 3.161758000000  | 0.183555000000  | -0.916841000000 |
| H | 1.327336000000  | 1.854407000000  | -0.649322000000 |
| C | -1.175515000000 | 1.215945000000  | 0.102012000000  |
| O | -0.080873000000 | 0.258897000000  | -0.044606000000 |
| C | -0.598372000000 | -1.105175000000 | -0.192931000000 |
| C | -2.110530000000 | -0.938057000000 | -0.211926000000 |
| C | -2.322120000000 | 0.353448000000  | 0.583895000000  |
| H | -0.835107000000 | 1.975375000000  | 0.802529000000  |
| H | -1.366658000000 | 1.657547000000  | -0.879212000000 |
| H | -0.185825000000 | -1.516474000000 | -1.114194000000 |
| H | -0.237324000000 | -1.662278000000 | 0.670981000000  |
| H | -2.465555000000 | -0.811956000000 | -1.236818000000 |
| H | -2.609599000000 | -1.799387000000 | 0.229907000000  |
| H | -3.285009000000 | 0.823326000000  | 0.387312000000  |
| H | -2.228136000000 | 0.167232000000  | 1.655886000000  |

Vibrational frequencies

|           |           |           |
|-----------|-----------|-----------|
| 36.1421   | 57.1418   | 119.8321  |
| 161.8307  | 219.1945  | 258.5444  |
| 271.0312  | 312.9644  | 381.6547  |
| 532.3238  | 576.7147  | 654.0644  |
| 732.1676  | 756.3849  | 826.9796  |
| 865.1333  | 876.7411  | 918.4587  |
| 929.1692  | 935.0576  | 946.8106  |
| 956.4247  | 964.0969  | 1003.2715 |
| 1054.2591 | 1059.6663 | 1090.6340 |
| 1153.5469 | 1168.2641 | 1182.5918 |
| 1203.3231 | 1205.7863 | 1214.8821 |
| 1218.8602 | 1224.7702 | 1233.2843 |
| 1243.5394 | 1269.9718 | 1283.0694 |
| 1328.3147 | 1355.9988 | 1393.3437 |
| 1414.1911 | 1475.7023 | 1486.7664 |
| 1509.4961 | 1519.5602 | 1603.8844 |
| 2421.0757 | 2440.7105 | 2457.6627 |
| 2498.4926 | 2581.3661 | 3081.8436 |
| 3086.5058 | 3103.2027 | 3113.7211 |
| 3146.6478 | 3154.2513 | 3179.7548 |
| 3183.4996 | 3481.3416 | 3534.5584 |

## TS8

Zero-point correction= 0.238162 (Hartree/Particle)

Thermal correction to Energy= 0.251581

Thermal correction to Enthalpy= 0.252525

Thermal correction to Gibbs Free Energy= 0.198100

Sum of electronic and zero-point Energies= -397.377109

Sum of electronic and thermal Energies= -397.363691

Sum of electronic and thermal Enthalpies= -397.362746

Sum of electronic and thermal Free Energies= -397.417171

Cartesian coordinates

|   |                 |                 |                 |
|---|-----------------|-----------------|-----------------|
| B | -2.451266000000 | 0.281208000000  | 0.016376000000  |
| H | -3.225080000000 | 1.066946000000  | 0.477419000000  |
| H | -1.687651000000 | -0.299257000000 | 0.727668000000  |
| N | -0.976844000000 | 2.008113000000  | -0.319600000000 |
| H | -1.524858000000 | 2.629484000000  | 0.261701000000  |
| B | 0.478878000000  | 1.988130000000  | 0.063666000000  |
| H | -2.471555000000 | 0.049226000000  | -1.156549000000 |
| H | 0.700300000000  | 2.427970000000  | 1.166777000000  |
| H | -1.157446000000 | 2.260748000000  | -1.284020000000 |
| H | 1.250277000000  | 2.386200000000  | -0.788874000000 |
| N | -4.006515000000 | -1.373230000000 | 0.340242000000  |
| H | -4.851976000000 | -1.192833000000 | -0.193268000000 |
| H | -4.276070000000 | -1.436845000000 | 1.317585000000  |
| H | -3.665069000000 | -2.288620000000 | 0.062089000000  |
| C | 2.194499000000  | 0.178497000000  | 0.871088000000  |
| O | 0.915251000000  | 0.430389000000  | 0.220775000000  |
| C | 0.812736000000  | -0.404159000000 | -0.958477000000 |
| C | 1.494386000000  | -1.679102000000 | -0.511173000000 |
| C | 2.699234000000  | -1.139393000000 | 0.272554000000  |
| H | 2.853522000000  | 1.022119000000  | 0.659249000000  |
| H | 1.988325000000  | 0.130988000000  | 1.939166000000  |
| H | -0.244335000000 | -0.492052000000 | -1.194625000000 |
| H | 1.350246000000  | 0.090667000000  | -1.774716000000 |
| H | 0.824181000000  | -2.245868000000 | 0.139053000000  |
| H | 1.784694000000  | -2.306008000000 | -1.353664000000 |
| H | 3.039720000000  | -1.825993000000 | 1.046373000000  |
| H | 3.531092000000  | -0.945918000000 | -0.406217000000 |

Vibrational frequencies

|           |          |          |
|-----------|----------|----------|
| -480.8744 | 40.1405  | 54.5918  |
| 79.2404   | 99.0033  | 111.9270 |
| 130.4847  | 166.2198 | 180.3823 |
| 204.4435  | 215.7467 | 231.1000 |
| 314.0906  | 328.9692 | 349.4781 |
| 387.4576  | 453.4948 | 531.1033 |

|           |           |           |
|-----------|-----------|-----------|
| 599.1291  | 721.0984  | 767.6422  |
| 792.7472  | 833.0943  | 895.7461  |
| 903.7561  | 909.1776  | 916.9641  |
| 934.7519  | 952.4416  | 974.2086  |
| 981.2195  | 1005.0742 | 1064.9470 |
| 1083.0331 | 1101.1307 | 1105.9817 |
| 1139.1737 | 1156.8789 | 1160.2759 |
| 1163.0119 | 1182.5652 | 1212.5572 |
| 1233.3969 | 1236.2139 | 1260.6052 |
| 1285.9482 | 1326.3319 | 1343.1684 |
| 1388.4688 | 1411.2633 | 1481.2502 |
| 1493.7577 | 1511.1367 | 1524.2187 |
| 1610.1974 | 1632.6730 | 1639.8577 |
| 2433.5014 | 2516.6585 | 2549.0569 |
| 2639.6863 | 2654.0453 | 3079.2253 |
| 3085.6263 | 3087.7640 | 3100.8633 |
| 3140.4750 | 3153.9198 | 3165.9932 |
| 3188.2890 | 3491.4423 | 3564.1751 |
| 3616.3495 | 3617.8299 | 3643.2678 |

## TS9

Zero-point correction= 0.240143 (Hartree/Particle)

Thermal correction to Energy= 0.252894

Thermal correction to Enthalpy= 0.253838

Thermal correction to Gibbs Free Energy= 0.201121

Sum of electronic and zero-point Energies= -397.398653

Sum of electronic and thermal Energies= -397.385903

Sum of electronic and thermal Enthalpies= -397.384959

Sum of electronic and thermal Free Energies= -397.437676

Cartesian coordinates

|   |                 |                 |                 |
|---|-----------------|-----------------|-----------------|
| B | -2.469295000000 | -1.637024000000 | 0.788976000000  |
| H | -2.906034000000 | -2.679399000000 | 0.334430000000  |
| H | -3.369852000000 | -0.930989000000 | 1.199500000000  |
| N | -1.731061000000 | -0.846633000000 | -0.400957000000 |
| H | -2.391154000000 | -0.696449000000 | -1.161438000000 |
| B | -1.101454000000 | 0.513353000000  | -0.042271000000 |
| H | -1.645886000000 | -1.845256000000 | 1.656284000000  |
| H | -1.203754000000 | 0.902316000000  | 1.074158000000  |
| H | -1.019842000000 | -1.458916000000 | -0.797643000000 |
| H | -0.634869000000 | 1.173281000000  | -0.919728000000 |
| N | -3.145175000000 | 1.559751000000  | -0.406006000000 |
| H | -3.592002000000 | 1.587953000000  | -1.319110000000 |
| H | -2.998119000000 | 2.523647000000  | -0.120068000000 |
| H | -3.813267000000 | 1.154236000000  | 0.244524000000  |
| C | 1.576218000000  | 0.613823000000  | 1.101228000000  |

|   |                |                 |                 |
|---|----------------|-----------------|-----------------|
| O | 0.724216000000 | -0.290914000000 | 0.366086000000  |
| C | 1.436844000000 | -0.813047000000 | -0.776144000000 |
| C | 2.884459000000 | -0.369856000000 | -0.602433000000 |
| C | 2.718092000000 | 0.948815000000  | 0.154808000000  |
| H | 0.978181000000 | 1.474939000000  | 1.398680000000  |
| H | 1.930431000000 | 0.094795000000  | 1.996064000000  |
| H | 1.312557000000 | -1.897186000000 | -0.792345000000 |
| H | 0.992530000000 | -0.380364000000 | -1.679619000000 |
| H | 3.432424000000 | -1.091082000000 | 0.008515000000  |
| H | 3.393256000000 | -0.262278000000 | -1.560253000000 |
| H | 3.616333000000 | 1.258557000000  | 0.688917000000  |
| H | 2.419056000000 | 1.747632000000  | -0.529084000000 |

Vibrational frequencies

|           |           |           |
|-----------|-----------|-----------|
| -456.1421 | 41.3469   | 53.5504   |
| 98.2970   | 121.6037  | 124.7510  |
| 135.0987  | 159.5828  | 193.6255  |
| 225.2532  | 252.0966  | 279.1868  |
| 312.3564  | 337.1096  | 386.8099  |
| 417.9890  | 579.8271  | 648.3711  |
| 676.6838  | 737.3965  | 847.0849  |
| 860.3871  | 889.1068  | 904.9992  |
| 933.7180  | 937.7766  | 947.9866  |
| 953.7449  | 969.1793  | 986.8887  |
| 1020.3067 | 1053.5847 | 1091.0347 |
| 1113.5274 | 1121.6926 | 1170.7907 |
| 1172.2593 | 1193.8369 | 1195.6216 |
| 1202.6933 | 1207.8537 | 1215.2051 |
| 1217.9326 | 1251.9382 | 1277.9230 |
| 1281.4355 | 1323.7772 | 1349.3271 |
| 1387.0827 | 1416.7788 | 1475.3993 |
| 1486.4916 | 1517.4490 | 1529.2300 |
| 1599.2345 | 1635.2254 | 1639.6402 |
| 2413.3843 | 2447.6623 | 2458.8281 |
| 2616.7598 | 2708.4150 | 3050.3206 |
| 3066.3727 | 3073.7064 | 3077.1879 |
| 3122.8433 | 3136.5917 | 3142.8353 |
| 3160.8151 | 3485.0505 | 3511.2308 |
| 3561.4767 | 3604.7515 | 3613.3185 |
